# Supplementary material for: Electron Correlation or Basis Set Quality: How to Obtain Converged and Accurate NMR Shieldings for the Third-Row Elements?
Source: MDPI journal article supplement (doi:10.3390/molecules27238230), 2022-11-25
Supplement: s1 [file s1]

*Supplementary Materials*

# Electron Correlation or Basis Set Quality: How to Obtain Converged and Accurate NMR Shieldings for the Third-Row Elements?

Kacper Rzepiela <sup>1</sup>, Jakub Kaminský <sup>2,\*</sup>, Aneta Buczek <sup>1</sup>, Małgorzata A. Broda <sup>1</sup> and Teobald Kupka <sup>1,\*</sup>

<sup>1</sup> Faculty of Chemistry, University of Opole, 48 Oleska Street, 46-052 Opole, Poland <sup>2</sup> Institute of Organic Chemistry and Biochemistry of the CAS, Flemingovo nám. 2, 166 10 Prague, Czech Republic

\* Correspondence: kaminsky@uochb.cas.cz (J.K.); teobaldk@gmail.com (T.K.)

# Supplemental Material

## S1.1 Sensitivity of $^{23}\text{Na}$ parameters to the basis set quality

The  $^{23}\text{Na}$  nuclear shielding values calculated at the B3LYP/aug-cc-pVXZ and B3LYP/aug-cc-pCVXZ levels for NaH, but also for NaF are gathered in Table S6A. Table also presents NMR shieldings for NaF and NaH calculated at the HF-SCF and CCSD(T) levels with same basis sets as for B3LYP. Similarly, Table S6B then summarizes energies for two selected sodium species calculated at the B3LYP, HF-SCF and CCSD(T) levels with the aug-cc-pVXZ and aug-cc-pCVXZ basis sets.

The convergence patterns of  $^{23}\text{Na}$  isotropic shieldings according to the number of basis functions for NaH calculated at the HF-SCF, B3LYP-DFT and CCSD(T) levels of theory, combined with the aug-cc-pVXZ, aug-cc-pCVXZ, aug-pcSseg-*n* and x2c-Def2 basis set families are shown in Figure S7. It is apparent that  $^{23}\text{Na}$  isotropic shieldings predicted with the aug-cc-pVXZ series produce scattered results and a smooth convergence is for shieldings produced with the aug-pcSseg-*n* family. Interestingly, despite their small size, the x2c-Def2 basis set family performs fairly accurate in comparison to Jensen's or core-valence basis sets. Thus, apart from aug-cc-pCVXZ basis sets, the x2c-Def2 basis sets could be recommended for shielding calculations of  $^{23}\text{Na}$  nuclei. In addition, Figure S8 depicts very similar  $^{23}\text{Na}$  shielding patterns for NaF as for NaH with respect to the cardinal number *X* and the number of basis functions calculated with the B3LYP functional and aug-cc-pVXZ and aug-cc-pCVXZ basis set families. Note that the B3LYP/aug-cc-pVXZ and B3LYP/aug-cc-pCVXZ calculated energies of NaH and NaF show typical (exponential) patterns as seen in Figure S9.

According to Table S6A, the CCSD(T)/CBS (estimated with the core-valence basis sets)  $^{23}\text{Na}$  isotropic nuclear shielding in NaH is 569.555 ppm. When we consider also ZPVC of 0.29 ppm,

# Supplemental Material

RC of 7.74 ppm, and TC of -0.01 ppm (Table 4), the total shielding changes to its final value of 577.585 ppm.

## S1.2 Sensitivity of $^{25}\text{Mg}$ parameters to the basis set quality

The  $^{25}\text{Mg}$  nuclear shielding values calculated at the B3LYP level with the aug-cc-pVXZ, aug-cc-pCVXZ, aug-pcSseg-*n*, and x2c-Def2 basis sets for  $\text{MgH}_2$  are gathered in Table S7A, as well as the estimated CBS values. Analogously, Table S6B summarizes electronic energies of  $\text{MgH}_2$  calculated at the same levels for the first two basis set families. Figure S10 then, for clearer picture of the magnesium shielding behavior with increasing basis set, depicts convergence patterns of  $^{25}\text{Mg}$  NMR shieldings for  $\text{MgH}_2$  calculated with the CCSD(T) method. Again, four basis set families, aug-cc-pVXZ, aug-cc-pCVXZ, aug-pcSseg-*n*, and x2c-Def2 were used. Similarly to NaH, the results obtained with the aug-cc-pVXZ basis sets exhibit a slightly scattered and not converging behavior with increasing the basis set size. Interestingly, the difference between isotropic shieldings calculated with the lowest and the highest basis set (aug-cc-pVDZ and aug-cc-pV5Z) are -36, -98, and -73 ppm for HF-SCF, B3LYP and CCSD(T), respectively (see Table 7A). Besides, the difference between the aug-cc-pCV5Z and aug-cc-pV5Z  $^{25}\text{Mg}$  shielding calculated with these three methods was 7, -35 and -22 ppm, respectively. As expected, the results obtained with the core-valence basis set family, as well as with Jensen's and Karlsruhe type series smoothly converge towards the CBS limit (Figure S10).

According to Table S7A, the CCSD(T)/CBS (estimated with the core-valence basis sets)  $^{25}\text{Mg}$  isotropic nuclear shielding in  $\text{MgH}_2$  is 447.156 ppm. When we consider also ZPVC of 10.66 ppm, RC of 9.97 ppm, and TC of 1.36 ppm (Table 4), the total shielding changes to its final value of 467.786 ppm.

# Supplemental Material

In contrast, we can see a smooth energy convergence for  $\text{MgH}_2$  calculated with the B3LYP functional and the two basis sets in Figure S10B.

## S1.3 Sensitivity of $^{27}\text{Al}$ parameters to the basis set quality

As in previous sections, convergence patterns of  $^{27}\text{Al}$  NMR shielding constants for  $\text{AlH}_3$ , calculated with the HF-SCF, B3LYP and CCSD(T) methods, combined with the aug-cc-pVXZ, aug-cc-pCVXZ, aug-pcSseg- $n$ , and x2c-Def2 basis sets are gathered in Table S8A and the coupled cluster results are shown graphically in Figure S11A. Again, the CCSD(T) results obtained with the aug-cc-pVXZ basis sets show an irregular zig-zag pattern, which doesn't allow any reliable extrapolation of shieldings to the CBS limit. This is solved by utilizing the core-valence or Jensen's basis set family that converge smoothly towards the CBS following an exponential decay curve. The results, calculated with Karlsruhe basis set series are also near the CBS limit. Observed scatter of  $^{27}\text{Al}$  isotropic shieldings calculated at CCSD(T)/aug-cc-pVXZ level of theory is significant (ca. -74, -7, -15 ppm for  $X = \text{T} \rightarrow \text{D}$ ,  $\text{Q} \rightarrow \text{T}$  and  $5 \rightarrow \text{Q}$ ). To extend the choice of core-valence basis sets we also tested the performance of HF-SCF and CCSD(T) calculations with the aug-cc-pwVXZ family. The CCSD(T)/CBS (estimated with the aug-cc-pwVXZ basis sets)  $^{27}\text{Al}$  isotropic nuclear shielding in  $\text{AlH}_3$  was estimated as 307.762 ppm changing to 318.672 ppm after consideration of ZPVC, RC, and TC (-1.06 ppm, 11.92 ppm, and 0.01 ppm; see Table 4).

Table S8B also adds information of the B3LYP and CCSD(T) calculated energies for  $\text{AlH}_3$  using aug-cc-pVXZ and aug-cc-pCVXZ series of basis sets and Figure S11B shows the corresponding regular convergence of the B3LYP/aug-cc-pVXZ and B3LYP/aug-cc-pCVXZ calculated energy of  $\text{AlH}_3$ .

# Supplemental Material

## S1.4 Sensitivity of $^{29}\text{Si}$ parameters to the basis set quality

Another NMR nucleus in the third row is  $^{29}\text{Si}$ . Convergence patterns of  $^{29}\text{Si}$  NMR shielding constants for  $\text{SiH}_4$  calculated again with the HF-SCF, B3LYP and CCSD(T) methods, combined with the aug-cc-pVXZ, aug-cc-pCVXZ, aug-pcSseg-*n*, and x2c-Def2 basis sets are gathered in Table S9A and are depicted in Figure S12A. As seen before, the aug-cc-pVXZ basis sets provide again an irregular pattern that is impossible to reliably extrapolate to the CBS limit. However, the core-valence basis set family gives shieldings smoothly converging towards CBS. In case of  $\text{SiH}_4$ , the change of isotropic shieldings upon increasing the basis set size observed for aug-cc-pVXZ (-67, 14, -34 ppm for  $X = \text{T} \rightarrow \text{D}$ ,  $\text{Q} \rightarrow \text{T}$  and  $5 \rightarrow \text{Q}$ ) is comparable to changes of the  $^{27}\text{Al}$  NMR parameters. The estimated CCSD(T)/CBS(aug-cc-pCVXZ) of  $^{29}\text{Si}$  isotropic nuclear shielding in  $\text{SiH}_4$  is 470.854 ppm. When ZPVC, RC, and TC (20.28 ppm, 14.92 ppm, and -0.75 ppm; Table 4) are included the final value increases to 506.054 ppm. As before, the Jensen's and Karlsruhe type basis sets produce regularly converging patterns of  $^{29}\text{Si}$  isotropic nuclear shielding.

Table S9B compares the B3LYP and CCSD(T) energies of  $\text{SiH}_4$  calculated with the aug-cc-pVXZ and aug-cc-pCVXZ basis sets. In Figure S12B we can see regular energy convergences for  $\text{SiH}_4$  calculated using the B3LYP functional and the two Dunning's basis sets.

As an example of a silicon-containing molecule with the triple bond we picked  $\text{HSi} \equiv \text{CH}$ . Its NMR shieldings were calculated again with the HF-SCF, B3LYP, and CCSD(T) methods, combined with the aug-cc-pVXZ, aug-cc-pCVXZ, aug-pcSseg-*n*, and x2c-Def2 basis sets. All corresponding silicon nuclear shieldings are gathered in Table S9C. Since  $\text{HSi} \equiv \text{CH}$  contains a triple bond between silicon and carbon, it represents an interesting model because it is supposed

## Supplemental Material

to be highly anharmonic and ZPVC may play a significant role. This appeared partially true, as seen in Table 4. However, the calculated ZPVC varies with the level of theory (30.77 ppm for the mixed CCSD(T)/BHandHLYP level and -0.69 ppm for B3LYP). Moreover, due to its nature, the standard perturbational approach fails when the lowest vibrational modes were included in the PT2 formula. Thus, the contribution of the three lowest modes had to be excluded from the ZPVC estimates. Nevertheless, ZPVC for  $\text{HSi}\equiv\text{CH}$  may be unreliable and deserves further study in the future. Also, electron correlation is substantial (about 151 ppm on  $^{29}\text{Si}$ ) as documented in Table S9C.

### S1.5 Sensitivity of $^{33}\text{S}$ parameters to the basis set quality

Another NMR active nucleus of the third row lying in the sixth group is  $^{33}\text{S}$ . All  $^{33}\text{S}$  nuclear shielding values are gathered in Table S10A for  $\text{H}_2\text{S}$  and are calculated using the HF-SCF, B3LYP and CCSD(T) methods combined with the aug-cc-pVXZ, aug-cc-pCVXZ, aug-pcSseg- $n$ , and x2c-Def2 basis sets. In Table S10B there are the corresponding B3LYP and CCSD(T) energies calculated with the aug-cc-pVXZ and aug-cc-pCVXZ basis sets. Obviously, the nuclear shielding results obtained with the aug-cc-pVXZ basis set series are also scattered as we have seen for nuclei in other groups (Figure S13A). Thus, it is difficult to extrapolate these results to the CBS limit. However, the results obtained with the core-valence basis set family again converge towards CBS (see also ref.<sup>12</sup>) for  $X = \text{T}$  to 5. In case of  $\text{H}_2\text{S}$ , the magnitude of the scatter of isotropic shieldings calculated with CCSD(T)/aug-cc-pVXZ method is comparable to the  $^{31}\text{P}$  NMR parameters (see changes of -29, -3, -22 and -1 ppm for  $X = \text{T} \rightarrow \text{D}$ ,  $\text{Q} \rightarrow \text{T}$ ,  $5 \rightarrow \text{Q}$  and  $6 \rightarrow 5$ ). The isotropic CCSD(T)/CBS(aug-cc-pCVXZ)  $^{33}\text{S}$  nuclear shielding of 741.209 ppm from

## Supplemental Material

Table S10A was corrected using ZPVC, RC, and TC (-22.36 ppm, 24.80 ppm, and -0.51 ppm; Table 4) and the final value of 743.649 ppm was obtained.

As for other elements, Figure S13B in Supporting Information reveals smooth convergences of H<sub>2</sub>S energies calculated at the B3LYP level with the two basis sets.

### S1.6 Sensitivity of <sup>35</sup>Cl parameters to the basis set quality

Nuclear shielding values calculated using HF-SCF, B3LYP and CCSD(T) methods combined with the aug-cc-pVXZ, aug-cc-pCVXZ, aug-pcSseg-*n*, and x2c-Def2 basis sets for the 3<sup>rd</sup> row halogen, chlorine, are gathered in Table S11A. The B3LYP and CCSD(T) calculated energies using the aug-cc-pVXZ, aug-cc-pCVXZ basis sets for HCl can be found in Table S11B. Figure S14A shows convergence patterns of <sup>35</sup>Cl NMR shielding constants for HCl calculated with the four selected basis sets and using the CCSD(T) method. As before, the aug-cc-pVXZ basis set family produces unreliable and scattered results upon increasing the basis set size. Similarly as for previous nuclei, it is difficult to extrapolate these results to the CBS limit according to the *X* = T, Q, 5 and 6 data. On the other hand, corresponding points obtained with the aug-cc-pCVXZ show a nice decaying convergence pattern for *X* = T to 5. In case of HCl, the scatter of isotropic shieldings calculated with aug-cc-pVXZ is significantly smaller than for <sup>33</sup>S NMR parameters (see changes of about -16, -2, -11 and -1 ppm for *X* = T → D, Q → T, 5 → Q and 6 → 5). The CBS (CCSD(T)/aug-cc-pCVXZ) <sup>35</sup>Cl isotropic nuclear shielding in HCl was estimated as 957.943 ppm, which was later corrected by ZPVC (-18.29 ppm), RC (32.16 ppm), and TC (-0.42 ppm) to its final value of 971.813 ppm (see Table 4). There is also a nice convergence of chlorine shieldings calculated with the aug-pcSseg-*n* basis set family. The x2c-Def2 basis sets produce results close to the CBS value, estimated for the aug-cc-pCVXZ basis set hierarchy.

## Supplemental Material

Theoretical smooth energy convergences for HCl calculated with the B3LYP functional and the two Dunning's type basis sets are shown in Figure S14B in Supplemental Material.

### S1.7 Sensitivity of $^{39}\text{Ar}$ parameters to the basis set quality

Convergence patterns of hypothetical  $^{39}\text{Ar}$  NMR shielding constants calculated at the CCSD(T) level using the aug-cc-pVXZ, aug-cc-pCVXZ, aug-pcSseg-*n*, and x2c-Def2 basis sets are shown in Figure S15A and the individual HF-SCF, B3LYP, and CCSD(T) shieldings, as well as the estimated CBS values, are gathered in Table S12A. In this case, the results obtained with the aug-cc-pVXZ basis sets show a fairly regular convergence pattern. In contrast to previous hydrides, the  $^{39}\text{Ar}$  shieldings are nearly saturated and converge is starting from smaller basis sets (compare results obtained with aug-cc-pCVTZ, aug-cc-pCVQZ and aug-cc-pCV5Z). Thus, scattering of  $^{39}\text{Ar}$  isotropic shieldings calculated at the B3LYP/aug-cc-pVXZ level is significantly smaller (0.18, 0.01, 0.14, and 0.13 ppm for  $X = \text{T} \rightarrow \text{D}$ ,  $\text{Q} \rightarrow \text{T}$ ,  $5 \rightarrow \text{Q}$ , and  $6 \rightarrow 5$ , resp.) than that, which is observed for the  $^{35}\text{Cl}$  NMR parameters. Note that the estimated CBS (CCSD(T)/aug-cc-pCVXZ) value of the  $^{39}\text{Ar}$  isotropic nuclear shielding is 1237.924 ppm, so the observed changes with increasing basis set size are negligible. Besides, the aug-pcSseg-*n* and aug-cc-pVXZ basis sets perform similarly and their CBS results are about 0.5 ppm lower than the converged values for aug-cc-pCVXZ. On the other hand, shieldings calculated using Karlsruhe basis sets scattered more than expected. When the relativistic correction of 33.72 ppm is considered, we obtain the best value of 1271.644 ppm.

Figure S15B clearly reveals a smooth energy convergence for the argon atom calculated with the B3LYP functional and the two Dunning's basis sets.



# Supplemental Material

**Table S1A.** Theoretical  $^{31}\text{P}$  nuclear shielding values (in ppm) of  $\text{PH}_3$  calculated at the B3LYP, HF-SCF, and CCSD(T) level using various basis sets.

| $\text{PH}_3$         |       |                |                |                |
|-----------------------|-------|----------------|----------------|----------------|
| Basis set             | b. f. | B3LYP          | HF-SCF         | CCSD(T)        |
| <b>aVXZ</b>           |       |                |                |                |
| D                     | 54    | 629.029        | 645.500        | 669.295        |
| T                     | 119   | 577.881        | 602.124        | 625.354        |
| Q                     | 222   | 583.120        | 610.049        | 630.431        |
| 5                     | 371   | 557.361        | 580.829        | 601.383        |
| 6                     | 574   | 557.782        | 580.718        | 601.079        |
| <b>CBS(Q-6)</b>       |       | <b>553.876</b> | <b>576.501</b> | <b>596.957</b> |
| <b>aCVXZ</b>          |       |                |                |                |
| D                     | 63    | 591.385        | 612.462        | 639.239        |
| T                     | 144   | 561.534        | 584.555        | 608.292        |
| Q                     | 272   | 558.319        | 581.774        | 604.194        |
| 5                     | 457   | 558.027        | 581.523        | 603.368        |
| <b>CBS(T-5)</b>       |       | <b>557.847</b> | <b>581.367</b> | <b>603.326</b> |
| <b>apcSsegn</b>       |       |                |                |                |
| 0                     | 26    | 618.515        | 665.870        | 678.359        |
| 1                     | 60    | 571.99         | 597.015        | 621.910        |
| 2                     | 128   | 559.65         | 582.699        | 600.605        |
| 3                     | 248   | 557.74         | 581.030        | 602.087        |
| 4                     | 414   | 557.89         | 581.042        | 602.033        |
| <b>CBS(2-4)</b>       |       | <b>557.661</b> | <b>580.892</b> | <b>602.184</b> |
| <b>x2c-XZVPPall-s</b> |       |                |                |                |
| x2c-SVPall-s          | 45    | 551.927        | 585.077        | 601.819        |
| x2c-TZVPPall-s        | 96    | 558.755        | 583.521        | 604.065        |
| x2c-QZVPPall-s        | 172   | 553.668        | 577.512        | 598.945        |
| <b>CBS(1-3)</b>       |       | <b>556.340</b> | <b>580.073</b> | <b>601.348</b> |

# Supplemental Material

**Table S1B.** The B3LYP and CCSD(T) energies (in a.u.) of PH<sub>3</sub>

| PH <sub>3</sub> |                          |                       |
|-----------------|--------------------------|-----------------------|
| Basis set       | B3LYP                    | CCSD(T)               |
| <b>aVXZ</b>     |                          |                       |
| D               | -<br>343.16263598        | -342.65674477         |
| T               | -<br>343.18054477        | -342.74522177         |
| Q               | -<br>343.18524453        | -342.76498669         |
| 5               | -<br>343.18943646        | -342.89034025         |
| 6               | -<br>343.18998064        | -342.96350363         |
| <b>CBS(Q-6)</b> | -<br><b>343.19246832</b> | <b>-343.04039416</b>  |
| <b>aCVXZ</b>    |                          |                       |
| D               | -<br>343.16593385        | -342.860511137        |
| T               | -<br>343.18569238        | -343.026773502        |
| Q               | -<br>343.19001447        | -343.093932239        |
| 5               | -<br>343.19061671        | -343.121495928        |
| <b>CBS(T-5)</b> | -<br><b>343.19234535</b> | <b>-343.146144750</b> |

# Supplemental Material

**Table S2A.** The B3LYP  $^{31}\text{P}$  and  $^{15}\text{N}$  nuclear shielding components, isotropic shieldings and shielding anisotropy of  $\text{PN}^{\text{a}}$

| Basis set       | b. f. <sup>b</sup> | $^{31}\text{P}$      |                      |                       |                         | $^{15}\text{N}$      |                      |                       |                         |
|-----------------|--------------------|----------------------|----------------------|-----------------------|-------------------------|----------------------|----------------------|-----------------------|-------------------------|
|                 |                    | $\sigma_{\text{xx}}$ | $\sigma_{\text{zz}}$ | $\sigma_{\text{iso}}$ | $\sigma_{\text{aniso}}$ | $\sigma_{\text{xx}}$ | $\sigma_{\text{zz}}$ | $\sigma_{\text{iso}}$ | $\sigma_{\text{aniso}}$ |
| <b>aVXZ</b>     |                    |                      |                      |                       |                         |                      |                      |                       |                         |
| aVDZ            | 50                 | -414.054             | 966.072              | 45.988                | 1380.126                | -709.558             | 341.805              | -359.104              | 1051.363                |
| aVTZ            | 96                 | -525.830             | 965.611              | -28.683               | 1491.441                | -789.443             | 341.523              | -412.455              | 1130.966                |
| aVQZ            | 164                | -472.400             | 965.436              | 6.879                 | 1437.835                | -813.679             | 341.814              | -428.514              | 1155.493                |
| aV5Z            | 258                | -581.863             | 966.515              | -65.737               | 1548.378                | -824.679             | 341.831              | -435.843              | 1166.510                |
| aV6Z            | 382                | -577.533             | 966.520              | -62.849               | 1544.053                | -828.098             | 341.849              | -438.116              | 1169.948                |
| <b>CBS(5-6)</b> |                    | <b>-575.605</b>      | <b>966.522</b>       | <b>-61.563</b>        | <b>1542.127</b>         |                      |                      |                       |                         |
| <b>CBS(Q-6)</b> |                    |                      |                      |                       |                         | <b>-829.013</b>      | <b>341.84628</b>     | <b>-438.727</b>       | <b>1170.860</b>         |
| <b>aCVXZ</b>    |                    |                      |                      |                       |                         |                      |                      |                       |                         |
| aCVDZ           | 63                 | -537.347             | 966.292              | -36.134               | 1503.638                | -742.096             | 341.882              | -380.770              | 1083.977                |
| aCVTZ           | 134                | -569.885             | 966.146              | -57.875               | 1536.031                | -807.266             | 341.856              | -424.226              | 1149.122                |
| aCVQZ           | 243                | -571.027             | 966.329              | -58.575               | 1537.356                | -820.945             | 341.851              | -433.346              | 1162.796                |
| aCV5Z           | 398                | -572.093             | 966.331              | -59.285               | 1538.424                | -826.138             | 341.858              | -436.806              | 1167.995                |
| <b>CBS(T-5)</b> |                    | <b>-571.792</b>      | <b>966.350</b>       | <b>-59.078</b>        | <b>1538.142</b>         | <b>-825.545</b>      | <b>341.855</b>       | <b>-436.411</b>       | <b>1167.3988</b>        |
| <b>awCVXZ</b>   |                    |                      |                      |                       |                         |                      |                      |                       |                         |
| awCVDZ          | 63                 | -539.032             | 966.100              | -37.322               | 1505.132                | -745.086             | 341.738              | -382.811              | 1086.824                |

## *Supplemental Material*

|                 |     |                 |                |                |                 |                 |                |                 |                 |
|-----------------|-----|-----------------|----------------|----------------|-----------------|-----------------|----------------|-----------------|-----------------|
| awCVTZ          | 134 | -568.374        | 966.094        | -56.885        | 1534.468        | -801.810        | 341.817        | -420.601        | 1143.627        |
| awCVQZ          | 243 | -569.984        | 966.325        | -57.881        | 1536.309        | -818.980        | 341.850        | -432.037        | 1160.830        |
| awCV5Z          | 398 | -572.098        | 966.331        | -59.288        | 1538.428        | -826.129        | 341.857        | -436.800        | 1167.987        |
| <b>CBS(T-5)</b> |     | <b>-571.430</b> | <b>966.354</b> | <b>-58.835</b> | <b>1537.783</b> | <b>-825.133</b> | <b>341.858</b> | <b>-436.136</b> | <b>1166.991</b> |
| <b>apcn</b>     |     |                 |                |                |                 |                 |                |                 |                 |
| apc-1           | 50  | -516.962        | 966.843        | -22.360        | 1483.806        | -744.540        | 342.014        | -382.355        | 1086.553        |
| apc-2           | 96  | -561.408        | 966.691        | -52.042        | 1528.099        | -814.133        | 341.964        | -428.767        | 1156.097        |
| apc-3           | 178 | -568.151        | 966.688        | -56.538        | 1534.839        | -826.000        | 341.860        | -436.714        | 1167.860        |
| apc-4           | 286 | -571.124        | 966.687        | -58.520        | 1537.811        | -828.816        | 341.862        | -438.590        | 1170.678        |
| <b>CBS(2-4)</b> |     | <b>-570.606</b> | <b>966.687</b> | <b>-58.175</b> | <b>1537.293</b> | <b>-828.886</b> | <b>341.851</b> | <b>-438.641</b> | <b>1170.736</b> |
| <b>apcSsegn</b> |     |                 |                |                |                 |                 |                |                 |                 |
| apcSseg-1       | 59  | -578.815        | 966.522        | -63.702        | 1545.337        | -808.622        | 342.061        | -425.061        | 1150.683        |
| apcSseg-2       | 111 | -579.105        | 966.435        | -63.925        | 1545.540        | -827.185        | 342.022        | -437.449        | 1169.206        |
| apcSseg-3       | 198 | -574.961        | 966.428        | -61.165        | 1541.389        | -828.395        | 341.851        | -438.313        | 1170.246        |
| apcSseg-4       | 305 | -573.244        | 966.407        | -60.027        | 1539.650        | -828.289        | 341.865        | -438.238        | 1170.154        |
| <b>CBS(2-4)</b> |     | <b>-573.422</b> | <b>966.414</b> | <b>-60.143</b> | <b>1539.835</b> | <b>-828.475</b> | <b>341.839</b> | <b>-438.371</b> | <b>1170.314</b> |
| <b>apcJn</b>    |     |                 |                |                |                 |                 |                |                 |                 |
| apcJ-1          | 76  | -619.637        | 928.452        | -103.607       | 1548.088        | -               | 341.963        | -427.553        | 1154.275        |

## *Supplemental Material*

|                 |     |                 |                |                |                 |                      |                |                 |                 |
|-----------------|-----|-----------------|----------------|----------------|-----------------|----------------------|----------------|-----------------|-----------------|
|                 |     |                 |                |                |                 | 812.312              |                |                 |                 |
| apcJ-2          | 137 | -592.272        | 954.892        | -76.551        | 1547.164        | -<br>828.234         | 341.864        | -438.202        | 1170.098        |
| apcJ-3          | 220 | -583.702        | 958.924        | -69.493        | 1542.625        | -<br>828.163         | 341.840        | -438.162        | 1170.002        |
| apcJ-4          | 332 | -576.369        | 964.003        | -62.911        | 1540.372        | -<br>828.156         | 341.849        | -438.154        | 1170.006        |
| <b>CBS(2-4)</b> |     | <b>-577.405</b> | <b>962.963</b> | <b>-63.948</b> | <b>1540.368</b> | <b>-<br/>828.146</b> | <b>341.842</b> | <b>-438.150</b> | <b>1169.988</b> |

<sup>a</sup>All NMR calculations were performed at CCSD(T)/aug-pc-4 geometry (1.49466464 Å); <sup>b</sup>Number of basis functions

# Supplemental Material

**Table S2B.** Diamagnetic (DSO) and paramagnetic (PSO) contributions (in ppm) to the phosphorus nuclear shielding of PN calculated at the B3LYP level using various basis sets.

| PN    |                  |                  |                  |                  |
|-------|------------------|------------------|------------------|------------------|
|       | <b>aVDZ</b>      | <b>aVTZ</b>      | <b>aVQZ</b>      | <b>aV5Z</b>      |
| DSO   | 971.43           | 971.94           | 949.46           | 962.39           |
| PSO   | -925.45          | -1000.60         | -942.54          | -1028.41         |
| Total | 45.98            | -28.66           | 6.92             | -66.02           |
|       | <b>aCVDZ</b>     | <b>aCVTZ</b>     | <b>aCVQZ</b>     | <b>aCV5Z</b>     |
| DSO   | 974.16           | 964.91           | 966.54           | 967.84           |
| PSO   | -1010.31         | -1022.79         | -1025.12         | -1027.13         |
| Total | -36.15           | -57.88           | -58.58           | -59.29           |
|       | <b>apcSseg-1</b> | <b>apcSseg-2</b> | <b>apcSseg-3</b> | <b>apcSseg-4</b> |
| DSO   | 967.90           | 966.65           | 967.93           | 969.23           |
| PSO   | -1031.61         | -1030.59         | -1029.10         | -1029.26         |
| Total | -63.71           | -63.94           | -61.17           | -60.03           |
|       | <b>apc-1</b>     | <b>apc-2</b>     | <b>apc-3</b>     | <b>apc-4</b>     |
| DSO   | 967.67           | 966.74           | 969.19           | 972.15           |
| PSO   | -990.04          | -1018.77         | -1025.72         | -1030.59         |
| Total | -22.37           | -52.03           | -56.52           | -58.43           |
|       | <b>apcJ-1</b>    | <b>apcJ-2</b>    | <b>apcJ-3</b>    | <b>apcJ-4</b>    |
| DSO   | 933.19           | 956.84           | 959.13           | 959.04           |
| PSO   | -1036.80         | -1033.42         | -1028.64         | -1021.98         |
| Total | -103.62          | -76.57           | -69.51           | -62.95           |

# Supplemental Material

**Table S3.** The B3LYP  $^{31}\text{P}$  and  $^{15}\text{N}$  NMR parameters shown as differences between 2 cardinal numbers in PN (ppm)

| Basis set           | $^{31}\text{P}$ |               |                |                  | $^{15}\text{N}$ |               |                |                  |
|---------------------|-----------------|---------------|----------------|------------------|-----------------|---------------|----------------|------------------|
|                     | $\sigma_{xx}$   | $\sigma_{zz}$ | $\sigma_{iso}$ | $\sigma_{aniso}$ | $\sigma_{xx}$   | $\sigma_{zz}$ | $\sigma_{iso}$ | $\sigma_{aniso}$ |
| <b>aVXZ</b>         |                 |               |                |                  |                 |               |                |                  |
| (T $\rightarrow$ D) | -111.776        | -0.461        | -74.671        | 111.315          | -<br>79.885     | -0.282        | -53.350        | 79.603           |
| (Q $\rightarrow$ T) | 53.430          | -0.175        | 35.562         | -53.606          | -<br>24.236     | 0.291         | -16.060        | 24.527           |
| (5 $\rightarrow$ Q) | -109.464        | 1.079         | -72.616        | 110.543          | -<br>11.001     | 0.016         | -7.328         | 11.017           |
| (6 $\rightarrow$ 5) | 4.330           | 0.006         | 2.889          | -4.325           | -3.419          | 0.019         | -2.273         | 3.438            |
|                     |                 |               |                |                  |                 |               |                |                  |
| <b>aCVXZ</b>        |                 |               |                |                  |                 |               |                |                  |
| (T $\rightarrow$ D) | -32.539         | -0.146        | -21.741        | 32.392           | -<br>65.171     | -0.026        | -43.456        | 65.145           |
| (Q $\rightarrow$ T) | -1.142          | 0.183         | -0.700         | 1.325            | -<br>13.678     | -0.005        | -9.120         | 13.673           |
| (5 $\rightarrow$ Q) | -1.066          | 0.002         | -0.710         | 1.068            | -5.193          | 0.007         | -3.460         | 5.200            |
|                     |                 |               |                |                  |                 |               |                |                  |
| <b>awCVXZ</b>       |                 |               |                |                  |                 |               |                |                  |
| (T $\rightarrow$ D) | -29.342         | -0.006        | -19.563        | 29.336           | -<br>56.725     | 0.079         | -37.790        | 56.803           |
| (Q $\rightarrow$ T) | -1.610          | 0.231         | -0.996         | 1.841            | -<br>17.170     | 0.033         | -11.436        | 17.203           |
| (5 $\rightarrow$ Q) | -2.113          | 0.006         | -1.407         | 2.119            | -7.149          | 0.007         | -4.764         | 7.157            |
|                     |                 |               |                |                  |                 |               |                |                  |
| <b>apcn</b>         |                 |               |                |                  |                 |               |                |                  |
| (2-1)               | -44.446         | -0.153        | -29.681        | 44.293           | -<br>69.593     | -0.050        | -46.412        | 69.543           |
| (3-2)               | -6.743          | -0.003        | -4.496         | 6.740            | -<br>11.867     | -0.104        | -7.946         | 11.763           |
| (4-3)               | -2.973          | -0.001        | -1.983         | 2.972            | -2.816          | 0.002         | -1.877         | 2.818            |
|                     |                 |               |                |                  |                 |               |                |                  |
| <b>apcSsegn</b>     |                 |               |                |                  |                 |               |                |                  |
| (2 $\rightarrow$ 1) | -0.290          | -0.087        | -0.223         | 0.203            | -<br>18.563     | -0.039        | -12.388        | 18.524           |
| (3 $\rightarrow$ 2) | 4.143           | -0.007        | 2.760          | -4.150           | -1.210          | -0.170        | -0.864         | 1.040            |
| (4 $\rightarrow$ 3) | 1.718           | -0.021        | 1.138          | -1.739           | 0.106           | 0.013         | 0.075          | -0.092           |
|                     |                 |               |                |                  |                 |               |                |                  |
| <b>apcJn</b>        |                 |               |                |                  |                 |               |                |                  |
| (2 $\rightarrow$ 1) | 27.365          | 26.441        | 27.057         | -0.924           | -<br>15.923     | -0.100        | -10.649        | 15.823           |

## *Supplemental Material*

|         |       |       |       |        |       |        |       |        |
|---------|-------|-------|-------|--------|-------|--------|-------|--------|
| (3 → 2) | 8.570 | 4.031 | 7.057 | -4.539 | 0.072 | -0.024 | 0.040 | -0.095 |
| (4 → 3) | 7.333 | 5.080 | 6.582 | -2.253 | 0.006 | 0.010  | 0.008 | 0.003  |



# Supplemental Material

**TABLE S4.** Calculated B3LYP/CBS<sup>a</sup> <sup>31</sup>P nuclear shielding components, isotropic shieldings and shielding anisotropy of PN<sup>b</sup> with respect to cardinal number (X) The difference (in %) between the CBS values estimated with respect to the cardinal number X and the number of basis functions b.f. is shown as  $\Delta$  (%)

| PN                                 |               |               |                |                  |
|------------------------------------|---------------|---------------|----------------|------------------|
| Basis set                          | $\sigma_{xx}$ | $\sigma_{zz}$ | $\sigma_{iso}$ | $\sigma_{aniso}$ |
| <b>aVXZ</b>                        |               |               |                |                  |
| X (5-6)                            | -571.585      | 966.527       | -58.882        | 1538.112         |
| $\Delta$ (%)                       | 0.698         | 0.000         | 4.355          | 0.260            |
| <b>aCVXZ</b>                       |               |               |                |                  |
| X (Q-5)                            | -573.211      | 966.333       | -60.030        | 1539.545         |
| $\Delta$ (%)                       | -0.141        | 0.000         | -0.900         | -0.052           |
| <b>awCVXZ</b>                      |               |               |                |                  |
| X (Q-5)                            | -574.316      | 966.337       | -60.764        | 1540.651         |
| $\Delta$ (%)                       | -0.279        | 0.000         | -1.778         | -0.104           |
| <b>apcn</b>                        |               |               |                |                  |
| X (3-4)                            | -574.244      | 966.685       | -60.600        | 1540.929         |
| $\Delta$ (%)                       | -0.380        | 0.000         | -2.452         | -0.141           |
| <b>apcSsegn</b>                    |               |               |                |                  |
| X (3-4)                            | -571.441      | 966.385       | -58.833        | 1537.826         |
| $\Delta$ (%)                       | 0.202         | 0.001         | 1.284          | 0.076            |
| <b>apcJn</b>                       |               |               |                |                  |
| X (3-4)                            | -568.675      | 969.332       | -56.005        | 1538.008         |
| $\Delta$ (%)                       | 0.817         | -0.336        | 6.983          | 0.093            |
| CCSD(T)/aVXZ <sup>c</sup>          |               |               | 58.080         | 1362.090         |
| CCSD(T)/aCVXZ <sup>c</sup>         |               |               | 59.090         | 1361.250         |
| <b>Literature</b>                  |               |               |                |                  |
| PBE1PBE/6-311G(2d,2p) <sup>d</sup> |               |               | 35.7           |                  |
| B3LYP/6-311++G** <sup>e</sup>      |               |               | 53.0           |                  |
| CCSD(T)/15s12p4d3f2g <sup>f</sup>  |               |               | 53.4           |                  |

<sup>a</sup>Basis sets selected for fitting are in parenthesis; <sup>b</sup>All NMR calculations were performed using the CCSD(T)/aug-pc-4 geometry (1.49466464 Å); <sup>c</sup>From ref.12; <sup>d</sup>From ref.62; <sup>e</sup>From ref.63; <sup>f</sup>From ref.64

# Supplemental Material

**Table S5A.**  $^{31}\text{P}$  isotropic shieldings in  $\text{H}_3\text{PO}$  calculated at the B3LYP, HF-SCF, and CCSD(T) level in combination with the aug-cc-pVXZ, aug-cc-pCVXZ, and aug-pcSseg- $n$  basis sets.<sup>a</sup>

| <b>H<sub>3</sub>PO</b>        |              |                |                |                         |
|-------------------------------|--------------|----------------|----------------|-------------------------|
| <b>Basis set</b>              | <b>b. f.</b> | <b>B3LYP</b>   | <b>HF-SCF</b>  | <b>CCSD(T)</b>          |
| <b>aVXZ</b>                   |              |                |                |                         |
| D                             | 77           | 458.078        | 494.411        | 496.373                 |
| T                             | 165          | 381.595        | 431.022        | 427.424                 |
| Q                             | 302          | 390.328        | 441.573        | 433.032                 |
| 5                             | 498          | 350.188        | 399.961        | -                       |
| 6                             | 763          | 349.475        | 398.916        | -                       |
| <b>CBS(5-6)</b>               |              | <b>349.201</b> | <b>398.514</b> | <b>~396<sup>b</sup></b> |
| <b>aCVXZ</b>                  |              |                |                |                         |
| D                             | 90           | 402.100        | 447.671        | 451.545                 |
| T                             | 203          | 354.785        | 403.727        | 397.616                 |
| Q                             | 381          | 348.954        | 399.412        | 389.335                 |
| 5                             | 638          | 348.483        | 399.028        | -                       |
| <b>CBS(T-5)</b>               |              | <b>346.109</b> | <b>397.276</b> | <b>~388<sup>b</sup></b> |
| <b>apcSseg-<math>n</math></b> |              |                |                |                         |
| 0                             | 39           | 453.796        | 517.119        | 510.616                 |
| 1                             | 86           | 377.240        | 424.750        | 423.473                 |
| 2                             | 180          | 354.333        | 403.097        | 393.977                 |
| 3                             | 345          | 348.303        | 398.614        | 405.597                 |
| 4                             | 563          | 348.178        | 398.391        | -                       |
| <b>CBS(2-4)</b>               |              | <b>347.681</b> | <b>396.549</b> | <b>~400<sup>b</sup></b> |

<sup>a</sup>B3LYP/aug-cc-pV5Z geometry of  $\text{H}_3\text{P}=\text{O}$  was used (PO=1.476205; PH=1.412422 and HPO=116.746141); <sup>b</sup>A rough estimate from comparison of convergence patterns obtained with HF-SCF

# Supplemental Material

**Table S5B.** The B3LYP, HF-SCF, and CCSD(T) energies (in a.u.) of H<sub>3</sub>PO.

| <b>H<sub>3</sub>PO</b> |                  |                      |                      |                       |
|------------------------|------------------|----------------------|----------------------|-----------------------|
| <b>Basis set</b>       | <b>b.<br/>f.</b> | <b>B3LYP</b>         | <b>HF-SCF</b>        | <b>CCSD(T)</b>        |
| <b>aVXZ</b>            |                  |                      |                      |                       |
| D                      | 77               | -418.387596198       | -417.338510362       | -417.71138712         |
| T                      | 165              | -418.442930694       | -417.392246562       | -417.84168225         |
| Q                      | 302              | -418.457842226       | -417.406265295       | -417.88070359         |
| 5                      | 498              | -418.467265810       | -417.412337212       | -417.89555662         |
| 6                      | 763              | -418.468751518       | -417.413440044       | -417.90016792         |
| <b>CBS(Q-6)</b>        |                  | <b>-418.46966928</b> | <b>-417.41397975</b> | <b>-417.9008092</b>   |
| <b>aCVXZ</b>           |                  |                      |                      |                       |
| D                      | 90               | -418.394718919       | -417.342068132       | -417.71850259         |
| T                      | 203              | -418.456313671       | -417.401126555       | -417.85452001         |
| Q                      | 381              | -418.467766367       | -417.411848696       | -417.88841014         |
| 5                      | 638              | -418.469661666       | -417.413678259       | -417.89784511         |
| <b>CBS(T-5)</b>        |                  | <b>-418.46997783</b> | <b>-417.41395163</b> | <b>-417.89721138</b>  |
| <b>apcSsegn</b>        |                  |                      |                      |                       |
| <b>1</b>               | 86               | -418.376478710       | -417.311315008       | -417.68361574         |
| <b>2</b>               | 180              | -418.457227447       | -417.398157629       | -417.84214735         |
| <b>3</b>               | 345              | -418.469109581       | -417.411219687       | -417.88403616         |
| <b>4</b>               | 563              | -418.469750122       | -417.412294093       | -417.89429699         |
| <b>CBS(2-4)</b>        |                  | <b>-418.47056645</b> | <b>-417.41303735</b> | <b>-417.893.84342</b> |

# Supplemental Material

**Table S6A.** Theoretical  $^{23}\text{Na}$  nuclear shielding values (in ppm) of NaF and NaH calculated using various methods.

| NaF              |       |                | NaH   |                |                |                |
|------------------|-------|----------------|-------|----------------|----------------|----------------|
| Basis set        | b. f. | B3LYP          | b. f. | B3LYP          | HF-SCF         | CCSD(T)        |
| <b>aVXZ</b>      |       |                |       |                |                |                |
| D                | 50    | 592.819        | 36    | 593.102        | 580.656        | 585.782        |
| T                | 96    | 581.969        | 73    | 573.960        | 575.525        | 579.222        |
| Q                | 164   | 579.192        | 130   | 574.010        | 563.720        | 565.539        |
| 5                | 258   | 572.578        | 211   | 559.698        | 563.753        | 541.040        |
| <b>CBS(T-5)</b>  |       | <b>574.674</b> |       | <b>565.305</b> | <b>562.384</b> | <b>549.057</b> |
| <b>aCVXZ</b>     |       |                |       |                |                |                |
| D                | 63    | 586.976        | 45    | 583.678        | 570.165        | 579.072        |
| T                | 134   | 580.693        | 98    | 572.513        | 564.175        | 569.292        |
| Q                | 243   | 580.332        | 180   | 572.662        | 565.081        | 569.674        |
| 5                | 398   | 580.362        | 297   | 572.697        | 565.24         | 569.408        |
| <b>CBS(T-5)</b>  |       | <b>580.311</b> |       | <b>572.698</b> | <b>565.269</b> | <b>569.555</b> |
| <b>apcSseg-n</b> |       |                |       |                |                |                |
| 0                | 27    | 588.892        | 17    | 577.289        | 571.090        | 579.412        |
| 1                | 46    | 578.504        | 29    | 572.142        | 563.866        | 572.481        |
| 2                | 89    | 580.728        | 60    | 572.635        | 564.406        | 572.457        |
| 3                | 160   | 580.113        | 112   | 572.729        | 565.084        | 572.016        |
| 4                | 249   | 580.066        | 186   | 572.753        | 565.211        | 572.371        |
| <b>CBS(2-4)</b>  |       | <b>579.815</b> |       | <b>572.789</b> | <b>565.478</b> | <b>572.180</b> |

**Table S6B.** Calculated energies (in a.u.) of NaF and NaH.

| NaF             |                      | NaH                  |                      |
|-----------------|----------------------|----------------------|----------------------|
| Basis set       | B3LYP                | B3LYP                | CCSD(T)              |
| <b>aVXZ</b>     |                      |                      |                      |
| D               | -262.204869156       | -162.86387918        | -162.422001078       |
| T               | -262.237660615       | -162.87141560        | -162.44338745        |
| Q               | -262.247642152       | -162.87414279        | -162.45537297        |
| 5               | -262.251590656       | -162.87510466        | -162.45892442        |
| <b>CBS(T-5)</b> | <b>-262.25527211</b> | <b>-162.87612472</b> | <b>-162.46348953</b> |
| <b>aCVXZ</b>    |                      |                      |                      |
| D               | -262.20827680        | -162.86540524        | -162.61455950        |
| T               | -262.24443261        | -162.87621861        | -162.71919341        |
| Q               | -262.25322055        | -162.87802768        | -162.77681296        |
| 5               | -262.25542162        | -162.87831464        | -162.80221667        |
| <b>CBS(T-5)</b> | <b>-262.25881776</b> | <b>-162.87903395</b> | <b>-162.82315118</b> |

# Supplemental Material

**Table S7A.**  $^{25}\text{Mg}$  nuclear shielding values (in ppm) of  $\text{MgH}_2$  calculated at the HF-SCF, B3LYP, and CCSD(T) level, combined with the aug-cc-pVXZ, aug-cc-pCVXZ, aug-pcSseg- $n$ , and x2c-Def2 basis sets.

| $\text{MgH}_2$                |       |                |                |                |
|-------------------------------|-------|----------------|----------------|----------------|
| Basis set                     | b. f. | B3LYP          | HF-SCF         | CCSD(T)        |
| <b>aVXZ</b>                   |       |                |                |                |
| D                             | 45    | 486.035        | 503.602        | 496.843        |
| T                             | 96    | 459.192        | 488.420        | 473.084        |
| Q                             | 176   | 421.519        | 485.928        | 469.522        |
| 5                             | 291   | 388.385        | 468.158        | 423.764        |
| <b>CBS(T-5)</b>               |       | <b>397.813</b> | <b>475.048</b> | <b>441.802</b> |
| <b>aCVXZ</b>                  |       |                |                |                |
| D                             | 54    | 473.001        | 489.815        | 484.616        |
| T                             | 121   | 439.339        | 470.668        | 457.479        |
| Q                             | 226   | 432.012        | 465.987        | 451.201        |
| 5                             | 377   | 423.201        | 461.617        | 445.393        |
| <b>CBS(T-5)</b>               |       | <b>426.089</b> | <b>462.948</b> | <b>447.156</b> |
| <b>apcSseg-<math>n</math></b> |       |                |                |                |
| 0                             | 20    | 459.402        | 486.743        | 467.466        |
| 1                             | 38    | 426.175        | 462.991        | 450.642        |
| 2                             | 83    | 426.234        | 459.800        | 447.809        |
| 3                             | 161   | 426.427        | 460.467        | 444.129        |
| 4                             | 272   | 426.676        | 460.780        | 444.226        |
| <b>CBS(2-4)</b>               |       | <b>426.588</b> | <b>460.706</b> | <b>443.870</b> |
| <b>x2c-XZVPPall-s</b>         |       |                |                |                |
| x2c-SVPall-s                  | 37    | 425.167        | 462.634        | 450.466        |
| x2c-TZVPPall-s                | 69    | 426.580        | 460.266        | 449.526        |
| x2c-QZVPPall-s                | 135   | 423.667        | 457.168        | 443.334        |
| <b>CBS(1-3)</b>               |       | <b>424.985</b> | <b>458.225</b> | <b>445.784</b> |

## Supplemental Material

**Table S7B.** The B3LYP and CCSD(T) energies (in a.u.) of MgH<sub>2</sub> calculated with the aug-cc-pVXZ and aug-cc-pCVXZ basis set series.

| <b>MgH<sub>2</sub></b> |                      |                      |
|------------------------|----------------------|----------------------|
| <b>Basis set</b>       | <b>B3LYP</b>         | <b>CCSD(T)</b>       |
| <b>aVXZ</b>            |                      |                      |
| D                      | -201.25953842        | -200.80399245        |
| T                      | -201.26997915        | -200.84155803        |
| Q                      | -201.27228212        | -200.85863579        |
| 5                      | -201.27465395        | -200.92482476        |
| <b>CBS(T-5)</b>        | <b>-201.27532589</b> | <b>-200.92390375</b> |
| <b>aCVXZ</b>           |                      |                      |
| D                      | -201.2615830         | -200.975948470       |
| T                      | -201.2731550         | -201.120087868       |
| Q                      | -201.2757430         | -201.17385263        |
| 5                      | -201.2766084         | -201.19787045        |
| <b>CBS(T-5)</b>        | <b>-201.2775821</b>  | <b>-201.21736633</b> |

# Supplemental Material

**Table S8A.**  $^{27}\text{Al}$  nuclear shielding values (in ppm) of  $\text{AlH}_3$  calculated at the HF-SCF, B3LYP, and CCSD(T) level, combined with the aug-cc-pVXZ, aug-cc-pCVXZ, aug-pcSseg- $n$ , and x2c-Def2 basis sets.

| $\text{AlH}_3$                |       |                |                |                |
|-------------------------------|-------|----------------|----------------|----------------|
| Basis set                     | b. f. | B3LYP          | HF-SCF         | CCSD(T)        |
| <b>aVXZ</b>                   |       |                |                |                |
| D                             | 54    | 356.842        | 418.019        | 398.363        |
| T                             | 119   | 267.533        | 352.723        | 324.075        |
| Q                             | 222   | 279.900        | 365.604        | 319.626        |
| 5                             | 371   | 264.302        | 344.518        | 305.039        |
| 6                             | 574   | 261.701        | 342.906        | Not conv.      |
| <b>CBS(Q-6)</b>               |       | <b>260.370</b> | <b>340.417</b> | <b>301.061</b> |
| <b>aCVXZ</b>                  |       |                | <b>awCVXZ</b>  | <b>awCVXZ</b>  |
| D                             | 63    | 292.346        | 350.971        | 318.748        |
| T                             | 144   | 270.502        | 348.433        | 311.521        |
| Q                             | 272   | 268.116        | 347.181        | 308.498        |
| 5                             | 457   | 266.955        | 346.512        | 307.726        |
| <b>CBS(T-5)</b>               |       | <b>267.211</b> | <b>346.671</b> | <b>307.762</b> |
| <b>apcSseg-<math>n</math></b> |       |                |                |                |
| 0                             | 26    | 224.919        | 321.006        | 264.706        |
| 1                             | 60    | 272.72         | 347.879        | 312.927        |
| 2                             | 128   | 266.47         | 344.749        | 307.232        |
| 3                             | 172   | 264.03         | 341.332        | 305.189        |
| 4                             | 414   | 266.649        | 346.004        | 306.424        |
| <b>CBS(2-4)</b>               |       | <b>265.630</b> | <b>344.362</b> | <b>305.775</b> |
| <b>x2c-XZVPPall-s</b>         |       |                |                |                |
| x2c-SVPall-s                  | 45    | 255.610        | 338.958        | 306.507        |
| x2c-TZVPPall-s                | 96    | 268.910        | 346.915        | 311.762        |
| x2c-QZVPPall-s                | 172   | 261.219        | 341.332        | 305.189        |
| <b>CBS(1-3)</b>               |       | <b>265.443</b> | <b>344.293</b> | <b>308.421</b> |

# Supplemental Material

**Table S8B.** The B3LYP and CCSD(T) energies (in a.u.) of AlH<sub>3</sub> calculated with the aug-cc-pVXZ and aug-cc-pCVXZ basis set series.

| AlH <sub>3</sub> |                          |                      |
|------------------|--------------------------|----------------------|
| Basis set        | B3LYP                    | CCSD(T)              |
| <b>aVXZ</b>      |                          |                      |
| D                | -<br>244.21922425        | -243.747570184       |
| T                | -<br>244.23360255        | -243.837834800       |
| Q                | -<br>244.23939987        | -243.83729289        |
| 5                | -<br>244.24097337        | -243.92943312        |
| 6                | -<br>244.24104531        | -                    |
| <b>CBS(Q-6)</b>  | -<br><b>244.24197328</b> | -                    |
| <b>CBS(T-5)</b>  | -                        | <b>-243.91801437</b> |
| <b>aCVXZ</b>     |                          |                      |
| D                | -<br>244.22201311        | -243.87445191        |
| T                | -<br>244.23785921        | -244.04698171        |
| Q                | -<br>244.24170076        | -244.12311882        |
| 5                | -<br>244.24227256        | -244.15894233        |
| <b>CBS(T-5)</b>  | -<br><b>244.24380456</b> | <b>-244.18633069</b> |



# Supplemental Material

**Table S9A.**  $^{29}\text{Si}$  nuclear shielding values (in ppm) of  $\text{SiH}_4$  calculated at the HF-SCF, B3LYP, and CCSD(T) level, combined with the aug-cc-pVXZ, aug-cc-pCVXZ, aug-pcSseg- $n$ , and x2c-Def2 basis sets.

| $\text{SiH}_4$                |       |                |                |                |
|-------------------------------|-------|----------------|----------------|----------------|
| Basis set                     | b. f. | B3LYP          | HF-SCF         | CCSD(T)        |
| <b>aVXZ</b>                   |       |                |                |                |
| D                             | 63    | 524.779        | 548.033        | 554.575        |
| T                             | 142   | 450.243        | 485.124        | 488.826        |
| Q                             | 268   | 457.562        | 506.361        | 501.517        |
| 5                             | 451   | 435.668        | 473.932        | 468.513        |
| <b>CBS(T-5)</b>               |       | <b>445.370</b> | <b>489.275</b> | <b>483.294</b> |
| <b>aCVXZ</b>                  |       |                |                |                |
| D                             | 72    | 473.6513       | 507.218        | 516.049        |
| T                             | 167   | 439.0493       | 476.680        | 476.451        |
| Q                             | 318   | 436.0286       | 474.938        | 471.664        |
| 5                             | 537   | 435.4506       | 479.932        | -              |
| <b>CBS(T-5)</b>               |       | <b>435.416</b> | <b>477.703</b> | <b>470.854</b> |
| <b>apcSseg-<math>n</math></b> |       |                |                |                |
| 0                             | 29    | 486.947        | 533.581        | 540.468        |
| 1                             | 69    | 444.030        | 483.088        | 483.900        |
| 2                             | 151   | 436.940        | 475.284        | 469.321        |
| 3                             | 297   | 434.980        | 473.826        | 469.018        |
| 4                             | 500   | 435.270        | 473.974        | -              |
| <b>CBS(2-4)</b>               |       | <b>434.990</b> | <b>473.79</b>  | <b>468.972</b> |
| <b>x2c-XZVPPall-s</b>         |       |                |                |                |
| x2c-SVPall-s                  | 53    | 441.080        | 480.403        | 482.139        |
| x2c-TZVPPall-s                | 113   | 437.239        | 475.830        | 472.508        |
| x2c-QZVPPall-s                | 205   | 431.572        | 470.8032       | 467.086        |
| <b>CBS(1-3)</b>               |       | <b>433.841</b> | <b>472.744</b> | <b>468.890</b> |

# Supplemental Material

**Table S9B.** The B3LYP and CCSD(T) energies (in a.u.) of SiH<sub>4</sub>

| SiH <sub>4</sub> |                          |                      |
|------------------|--------------------------|----------------------|
| Basis set        | B3LYP                    | CCSD(T)              |
| <b>aVXZ</b>      |                          |                      |
| D                | -<br>291.89879366        | -291.4087569985      |
| T                | -<br>291.91847211        | -291.5056560050      |
| Q                | -<br>291.92448059        | -291.504971737       |
| 5                | -<br>291.92810244        | -291.627661525       |
| 6                | -<br>291.92866588        | -                    |
| <b>CBS(Q-6)</b>  | -<br><b>291.93081935</b> | -                    |
| <b>CBS(T-5)</b>  |                          | <b>-291.61247239</b> |
| <b>aCVXZ</b>     |                          |                      |
| D                | -<br>291.90205678        | -291.607682461       |
| T                | -<br>291.92365987        | -291.765560806       |
| Q                | -<br>291.92870585        | -291.827830430       |
| 5                | -<br>291.92937201        | -                    |
| <b>CBS(T-5)</b>  | -<br><b>291.93139466</b> | -                    |
| <b>CBS(D-Q)</b>  | -                        | <b>-291.87327043</b> |

**Table S9C.** <sup>29</sup>Si nuclear shielding values (in ppm) of HSiCH calculated at the HF-SCF, B3LYP, and CCSD(T) level, combined with the aug-cc-pVXZ, aug-cc-pCVXZ, and aug-pcSseg-*n* basis sets.

| HSiCH       |         |              |             |         |
|-------------|---------|--------------|-------------|---------|
| Basis set   | b. f.   | B3LYP        | HF-SCF      | CCSD(T) |
| <b>aVXZ</b> |         |              |             |         |
| D           | 68      | 556.68<br>46 | 905.47<br>5 | 666.826 |
| T           | 14<br>2 | 505.96<br>67 | 903.96<br>2 | 634.782 |
| Q           | 25<br>6 | 511.87<br>6  | 905.15<br>8 | 641.418 |
| 5           | 41<br>8 | 499.51<br>18 | 914.77<br>7 | 624.410 |

## *Supplemental Material*

|                   |         |                |                |                |
|-------------------|---------|----------------|----------------|----------------|
| 6                 | 63<br>6 | 501.14<br>38   | -              | -              |
| <b>CBS(T-5,6)</b> |         | <b>498.605</b> | <b>917.646</b> | <b>619.338</b> |
| <b>aCVXZ</b>      |         |                |                |                |
| D                 | 81      | 514.935        | 900.384        | 645.931        |
| T                 | 180     | 502.124        | 904.667        | 630.532        |
| Q                 | 335     | 501.597        | 907.255        | 630.168        |
| 5                 | 558     | 501.171        | 907.519        | -              |
| <b>CBS(T-5)</b>   |         | <b>501.293</b> | <b>907.666</b> | <b>630.101</b> |
| <b>apcSsegn</b>   |         |                |                |                |
| 1                 | 77      | 503.78<br>13   | 922.88<br>5    | 644.709        |
| 2                 | 15<br>7 | 500.70<br>14   | 914.77<br>2    | 625.185        |
| 3                 | 29<br>6 | 501.40<br>64   | 916.40<br>5    | 628.228        |
| 4                 | 47<br>7 | 501.78<br>46   | 914.66<br>1    | -              |
| <b>CBS(2-4)</b>   |         | <b>501.697</b> | <b>915.536</b> | <b>628.762</b> |

# Supplemental Material

**Table S10A.**  $^{33}\text{S}$  nuclear shielding values (in ppm) of  $\text{H}_2\text{S}$  calculated at the HF-SCF, B3LYP, and CCSD(T) level, combined with the aug-cc-pVXZ, aug-cc-pCVXZ, aug-pcSseg- $n$ , and x2c-Def2 basis sets.

| $\text{H}_2\text{S}$          |       |                |                |                |
|-------------------------------|-------|----------------|----------------|----------------|
| Basis set                     | b. f. | B3LYP          | HF-SCF         | CCSD(T)        |
| <b>aVXZ</b>                   |       |                |                |                |
| D                             | 45    | 757.263        | 768.299        | 794.741        |
| T                             | 96    | 721.620        | 738.199        | 765.513        |
| Q                             | 176   | 722.836        | 736.350        | 762.929        |
| 5                             | 291   | 699.124        | 712.597        | 740.623        |
| 6                             | 447   | 698.200        | 712.258        | 740.020        |
| <b>CBS(Q-6)</b>               |       | <b>694.933</b> | <b>708.776</b> | <b>736.852</b> |
| <b>aCVXZ</b>                  |       |                |                |                |
| D                             | 54    | 726.299        | 740.258        | 770.194        |
| T                             | 121   | 702.600        | 716.827        | 745.570        |
| Q                             | 226   | 698.785        | 713.141        | 741.832        |
| 5                             | 377   | 698.501        | 712.906        | 741.393        |
| <b>CBS(T-5)</b>               |       | <b>698.246</b> | <b>712.644</b> | <b>741.209</b> |
| <b>apcSseg-<math>n</math></b> |       |                |                |                |
| 0                             | 23    | 746.908        | 793.434        | 804.953        |
| 1                             | 51    | 709.21         | 726.433        | 755.754        |
| 2                             | 105   | 700.97         | 715.123        | 739.502        |
| 3                             | 199   | 698.26         | 719.781        | 743.898        |
| 4                             | 328   | 698.37         | 712.476        | 740.381        |
| <b>CBS(2-4)</b>               |       | <b>698.071</b> | <b>715.929</b> | <b>742.245</b> |
| <b>x2c-XZVPPall-s</b>         |       |                |                |                |
| x2c-SVPall-s                  | 37    | 728.757        | 755.384        | 770.757        |
| x2c-TZVPPall-s                | 79    | 701.935        | 719.781        | 743.898        |
| x2c-QZVPPall-s                | 139   | 694.072        | 709.531        | 736.967        |
| <b>CBS(1-3)</b>               |       | <b>695.877</b> | <b>711.844</b> | <b>738.358</b> |

# Supplemental Material

**Table S10B.** The B3LYP and CCSD(T) energies (in a.u.) of H<sub>2</sub>S.

| H <sub>2</sub> S |                          |                      |
|------------------|--------------------------|----------------------|
| Basis set        | B3LYP                    | CCSD(T)              |
| <b>aVXZ</b>      |                          |                      |
| D                | -<br>399.41468530        | -398.88839956        |
| T                | -<br>399.43217564        | -398.97922094        |
| Q                | -<br>399.43649626        | -399.01740712        |
| 5                | -<br>399.44059810        | -399.13954634        |
| 6                | -<br>399.44111883        | -399.21382420        |
| <b>CBS(Q-6)</b>  | -<br><b>399.44355253</b> | <b>-399.28887450</b> |
| <b>aCVXZ</b>     |                          |                      |
| D                | -<br>399.41755048        | -399.09628617        |
| T                | -<br>399.43695573        | -399.27659357        |
| Q                | -<br>399.44115027        | -399.34894772        |
| 5                | -<br>399.44175495        | -399.37832694        |
| <b>CBS(T-5)</b>  | -<br><b>399.44343012</b> | <b>-399.40492109</b> |

**Table S10C.** The B3LYP calculated <sup>33</sup>S nuclear shieldings for 2-thiouracil with aug-cc-pVXZ and aug-cc-pCVXZ basis sets on all atoms and within LDBS approach (all atoms with 6-31G\* basis set and only sulfur with aVXZ and aCVXZ)

| 2-TU      |     |                        |     |                                  |                         |         |     |          |
|-----------|-----|------------------------|-----|----------------------------------|-------------------------|---------|-----|----------|
| Basis set | All |                        |     |                                  | LDBS                    |         |     |          |
| (X)       |     | H, C, O, N, S:<br>aVXZ |     | H: aVXZ;<br>C, O, N, S:<br>aCVXZ | (C, O, N and H: 6-31G*) |         |     |          |
|           | bf  | B3LYP/aVXZ             | bf  |                                  | bf                      | S: aVXZ | bf  | S: aCVXZ |
| D         | 224 | 387.869                | 261 | 331.045                          | 133                     | 398.795 | 142 | 347.543  |
| T         | 464 | 335.860                | 580 | 306.502                          | 156                     | 365.034 | 181 | 332.193  |

# Supplemental Material

|               |            |                |      |                |     |                |     |                |
|---------------|------------|----------------|------|----------------|-----|----------------|-----|----------------|
| Q             | 828        | 343.732        | 1081 | 301.800        | 190 | 371.328        | 240 | 327.708        |
| 5             | 1340       | 299.099        | 1804 | 301.169        | 237 | 325.067        | 323 | 327.367        |
| 6             | 2024       | 298.830        | -    | -              | 299 | 325.205        | -   | -              |
| <b>CBS</b>    |            | <b>298.720</b> |      | <b>300.970</b> |     | <b>325.342</b> |     | <b>325.774</b> |
| <b>6-31G*</b> | <b>132</b> | <b>378.514</b> |      |                |     |                |     |                |

**Table S11A.**  $^{35}\text{Cl}$  nuclear shielding values (in ppm) of HCl calculated at the HF-SCF, B3LYP, and CCSD(T) level, combined with the aug-cc-pVXZ, aug-cc-pCVXZ, aug-pcSseg- $n$ , and x2c-Def2 basis sets.

| HCl                           |       |                |                |                 |
|-------------------------------|-------|----------------|----------------|-----------------|
| Basis set                     | b. f. | B3LYP          | HF-SCF         | CCSD(T)         |
| <b>aVXZ</b>                   |       |                |                |                 |
| D                             | 36    | 961.8332       | 977.258        | 986.763         |
| T                             | 73    | 945.2023       | 961.547        | 970.798         |
| Q                             | 130   | 944.7120       | 958.593        | 968.566         |
| 5                             | 211   | 932.9930       | 946.919        | 957.914         |
| 6                             | 320   | 931.7249       | 946.089        | 957.249         |
| <b>CBS(Q-6)</b>               |       | <b>930.256</b> | <b>944.476</b> | <b>955.745</b>  |
| <b>aCVXZ</b>                  |       |                |                |                 |
| D                             | 45    | 945.4964       | 961.169        | 972.344         |
| T                             | 98    | 933.9553       | 948.667        | 958.910         |
| Q                             | 180   | 932.1409       | 946.678        | 958.007         |
| 5                             | 297   | 931.9804       | 946.561        | 958.055         |
| <b>CBS(Q-6)</b>               |       | <b>931.858</b> | <b>946.403</b> | <b>957.943</b>  |
| <b>apcSseg-<math>n</math></b> |       |                |                |                 |
| 0                             | 20    | 941.602        | 980.478        | 977.953         |
| 1                             | 42    | 935.83         | 953.008        | 964.124         |
| 2                             | 82    | 934.08         | 948.579        | 956.537         |
| 3                             | 150   | 931.96         | 946.336        | 957.071         |
| 4                             | 242   | 931.91         | 946.272        | 957.442         |
| <b>CBS(2-4)</b>               |       | <b>931.705</b> | <b>946.060</b> | <b>957.3498</b> |
| <b>x2c-XZVPPall-s</b>         |       |                |                |                 |
| x2c-SVPall-s                  | 29    | 982.965        | 982.965        | 983.097         |
| x2c-TZVPPall-s                | 62    | 957.132        | 957.131        | 963.485         |
| x2c-QZVPPall-s                | 106   | 944.420        | 944.419        | 954.303         |

## *Supplemental Material*

|                 |  |                |                |                |
|-----------------|--|----------------|----------------|----------------|
| <b>CBS(1-3)</b> |  | <b>948.413</b> | <b>948.412</b> | <b>957.127</b> |
|-----------------|--|----------------|----------------|----------------|

# Supplemental Material

**Table S11B.** The B3LYP and CCSD(T) energies (in a.u.) of HCl

| HCl             |                      |                      |
|-----------------|----------------------|----------------------|
| Basis set       | B3LYP                | CCSD(T)              |
| <b>aVXZ</b>     |                      |                      |
| D               | -460.82758530        | -460.27881668        |
| T               | -460.84426235        | -460.37795747        |
| Q               | -460.84818174        | -460.42666503        |
| 5               | -460.85164037        | -460.54386650        |
| 6               | -460.85220096        | -460.62888464        |
| <b>CBS(Q-6)</b> | <b>-460.85425837</b> | <b>-460.70150484</b> |
| <b>aCVXZ</b>    |                      |                      |
| D               | -460.830248867       | -460.490880368       |
| T               | -460.848259238       | -460.68548124        |
| Q               | -460.852219393       | -460.76287445        |
| 5               | -460.852812828       | -460.79423489        |
| <b>CBS(T-5)</b> | <b>-460.85439165</b> | <b>-460.82268904</b> |



# Supplemental Material

**Table S12A.**  $^{39}\text{Ar}$  nuclear magnetic shielding values (in ppm) calculated for an isolated atom at the HF-SCF, B3LYP, and CCSD(T) level, combined with the aug-cc-pVXZ, aug-cc-pCVXZ, aug-pcSseg- $n$ , and x2c-Def2 basis sets.

| Ar                            |       |                 |                 |                 |
|-------------------------------|-------|-----------------|-----------------|-----------------|
| Basis set                     | b. f. | B3LYP           | HF-SCF          | CCSD(T)         |
| <b>aVXZ</b>                   |       |                 |                 |                 |
| D                             | 27    | 1237.382        | 1237.602        | 1237.071        |
| T                             | 50    | 1237.057        | 1237.615        | 1237.246        |
| Q                             | 84    | 1237.121        | 1237.651        | 1237.258        |
| 5                             | 131   | 1237.944        | 1237.657        | 1237.394        |
| 6                             | 193   | 1238.049        | 1237.658        | 1237.524        |
| <b>CBS(Q-6)</b>               |       | <b>1238.172</b> | <b>1237.659</b> | <b>1237.509</b> |
| <b>aCVXZ</b>                  |       |                 |                 |                 |
| D                             | 36    | 1237.399        | 1237.570        | 1237.119        |
| T                             | 75    | 1237.610        | 1237.621        | 1237.644        |
| Q                             | 134   | 1237.836        | 1237.655        | 1237.846        |
| 5                             | 217   | 1237.846        | 1237.657        | 1237.937        |
| <b>CBS(T-5)</b>               |       | <b>1237.868</b> | <b>1237.660</b> | <b>1237.924</b> |
| <b>apcSseg-<math>n</math></b> |       |                 |                 |                 |
| 0                             | 17    | 1236.404        | 1236.578        | 1236.178        |
| 1                             | 33    | 1237.716        | 1237.155        | 1236.677        |
| 2                             | 59    | 1237.881        | 1237.269        | 1237.004        |
| 3                             | 101   | 1237.936        | 1237.507        | 1237.404        |
| 4                             | 156   | 1237.915        | 1237.498        | 1237.497        |
| <b>CBS(2-4)</b>               |       | <b>1237.930</b> | <b>1237.534</b> | <b>1237.516</b> |
| <b>x2c-XZVPPall-s</b>         |       |                 |                 |                 |
| x2c-SVPall-s                  | 21    | 1249.189        | 1248.648        | 1248.437        |
| x2c-TZVPPall-s                | 45    | 1249.336        | 1248.803        | 1248.634        |
| x2c-QZVPPall-s                | 73    | 1236.887        | 1236.677        | 1236.579        |
| <b>CBS(1-3)</b>               |       | <b>1242.409</b> | <b>1242.056</b> | <b>1241.920</b> |

# Supplemental Material

**Table S12B.** The B3LYP and CCSD(T) energies (in a.u.) of isolated Ar atom.

| Ar              |                          |                      |
|-----------------|--------------------------|----------------------|
| Basis set       | B3LYP                    | CCSD(T)              |
| <b>aVXZ</b>     |                          |                      |
| D               | -<br>527.54538899        | -526.97518862        |
| T               | -<br>527.56000196        | -527.08028270        |
| Q               | -<br>527.56367703        | -527.13763465        |
| 5               | -<br>527.56633502        | -527.25062305        |
| 6               | -<br>527.56703390        | -527.34980274        |
| <b>CBS(Q-6)</b> | -<br><b>527.56805707</b> | <b>-527.38485741</b> |
| <b>aCVXZ</b>    |                          |                      |
| D               | -<br>527.54773771        | -527.19113752        |
| T               | -<br>527.56317741        | -527.39744948        |
| Q               | -<br>527.56703529        | -527.48090156        |
| 5               | -<br>527.56763687        | -527.51450674        |
| <b>CBS(T-5)</b> | -<br><b>527.56917203</b> | <b>-527.54521404</b> |

**Table S13.** Relativistic corrections of PN (in ppm) calculated at the B3LYP/aug-cc-pVXZ level (X = D, T, Q)

| B3LYP/aVXZ | PN    |
|------------|-------|
| D          | 29.82 |
| T          | 19.50 |
| Q          | 12.37 |

# Supplemental Material

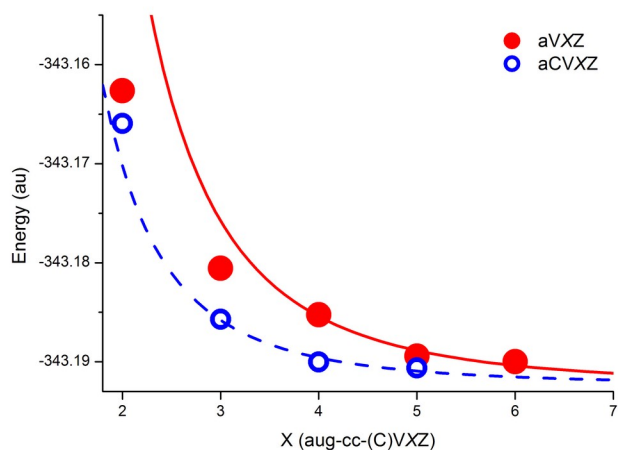

**Figure S1.** Convergences of the B3LYP/aug-cc-pVXZ and B3LYP/aug-cc-pCVXZ energies of  $\text{PH}_3$  with fitting lines shown.

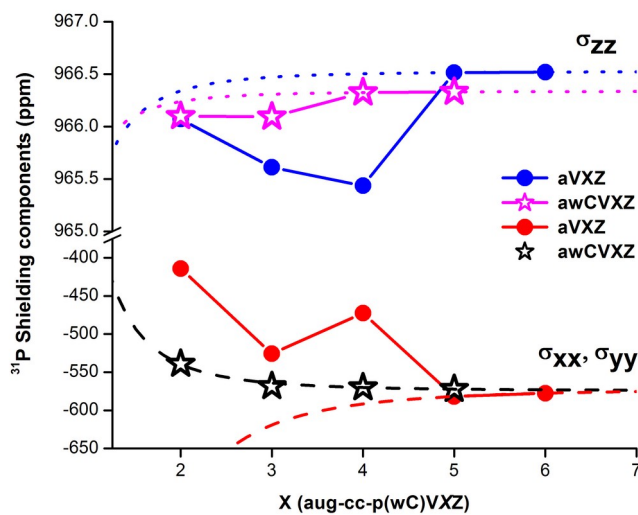

$$\sigma_{xx} = \sigma_{yy}$$

**Figure S2.** Theoretical  $\sigma_{xx}$  ( $= \sigma_{yy}$ ) and  $\sigma_{zz}$  components of  $^{31}\text{P}$  nuclear shielding constants in PN calculated at the B3LYP/aug-cc-pVXZ and the B3LYP/aug-cc-pwCVXZ levels, where  $X=2-5$  or  $6$ . The fitting curves estimated with the 2-parameter formula are shown as well.

# Supplemental Material

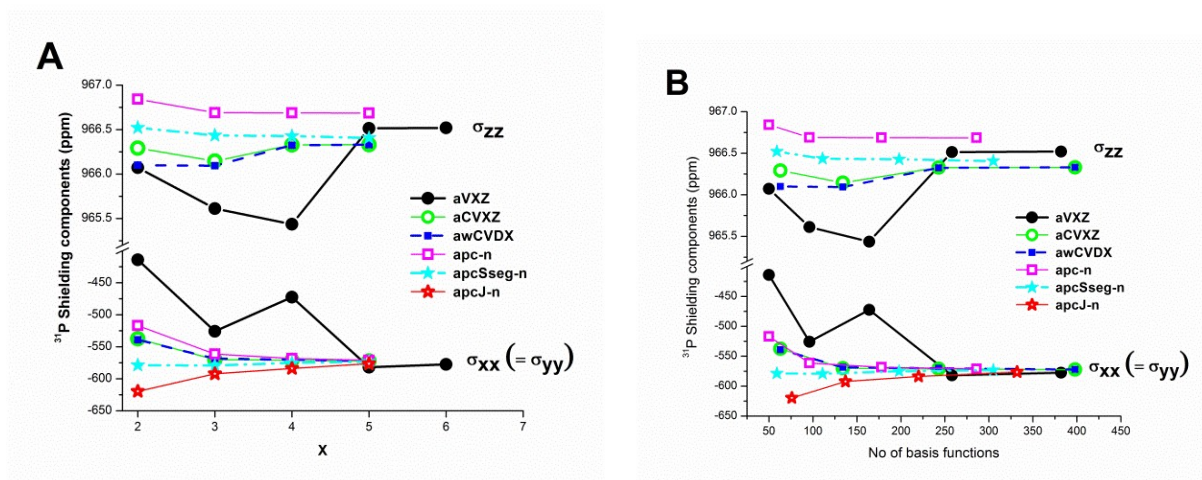

**Figure S3.** B3LYP calculated  $\sigma_{xx} (= \sigma_{yy})$  and  $\sigma_{zz}$  components of the  $^{31}\text{P}$  shielding constants of PN calculated with selected Dunning's and Jensen's basis set families plotted against (A) the cardinal number  $X$  and (B) the number of basis functions.

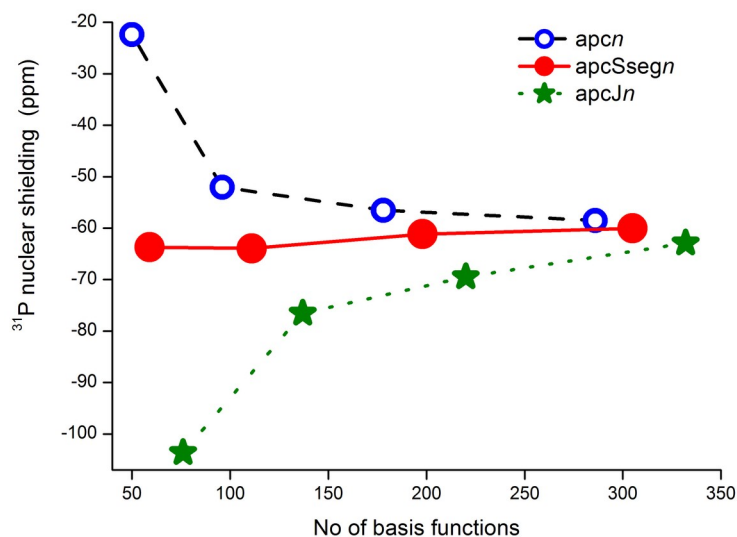

**Figure S4.** Performance of Jensen's basis sets using the B3LYP functional in prediction of  $^{31}\text{P}$  shielding in PN.

## Supplemental Material

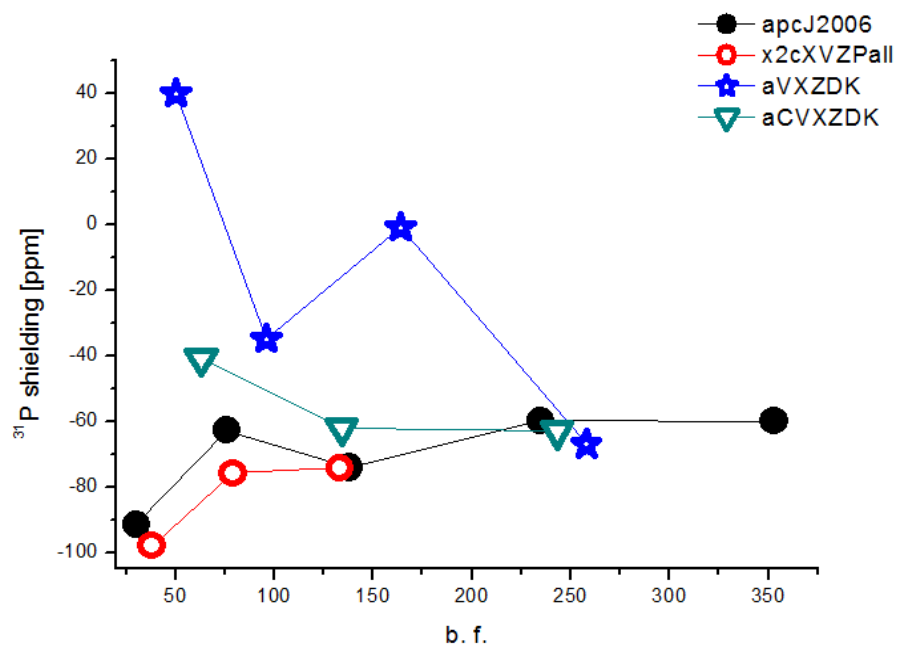

## Supplemental Material

**Figure S5.** Convergence of  $^{31}\text{P}$  shieldings in PN calculated with the B3LYP functional and the aug-pcJ2006, x2c-Def2, aug-cc-pVXZ-DK, and aug-cc-pCVXZ-DK basis set series.

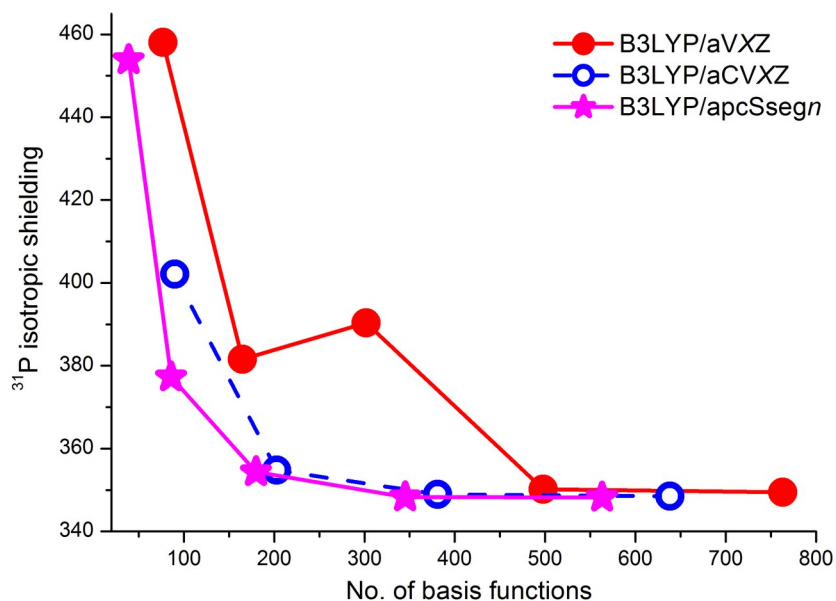

**Figure S6.** Convergence patterns of  $^{31}\text{P}$  isotropic shieldings in  $\text{H}_3\text{PO}$  calculated with B3LYP and HF-SCF in combination with aug-cc-pVXZ basis set series and B3LYP/aug-pcSseg- $n$  level of theory.

# Supplemental Material

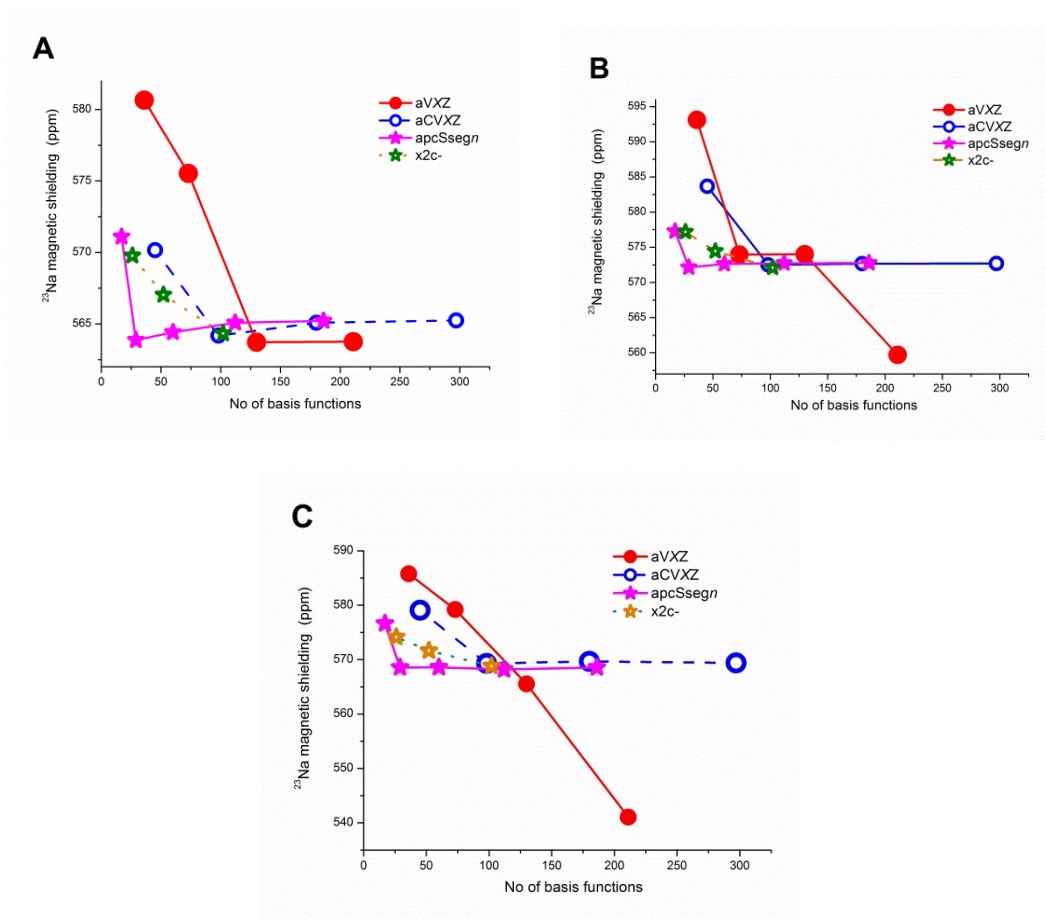

**Figure S7.**  $^{23}\text{Na}$  isotropic shielding constants for NaH calculated with the (A) HF-SCF, (B) B3LYP and (C) CCSD(T) methods, using the aug-cc-pVXZ, aug-cc-pCVXZ, aug-pcSseg- $n$  and x2c-Def2 basis set families.

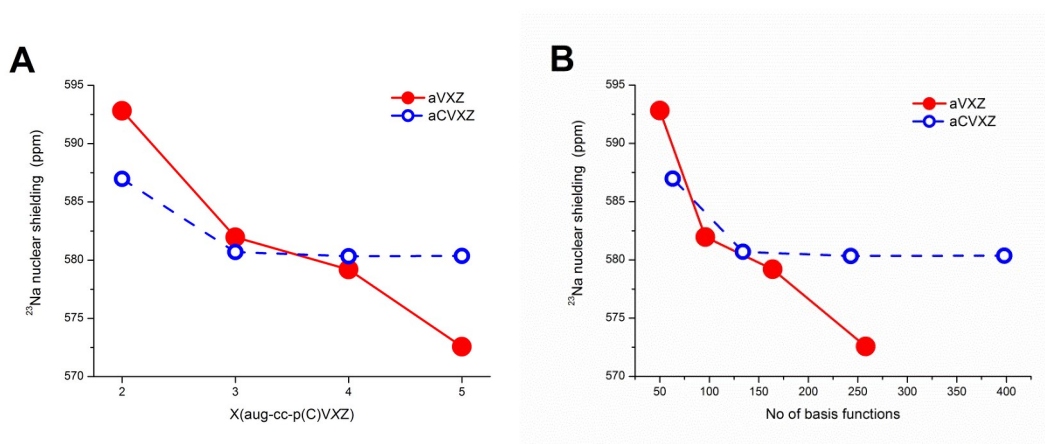

**Figure S8.** The B3LYP  $^{23}\text{Na}$  shielding constants with respect to (A) the cardinal number  $X$  and (B) the number of basis functions for NaF calculated with the aug-cc-pVXZ and aug-cc-pCVXZ basis set families.

# Supplemental Material

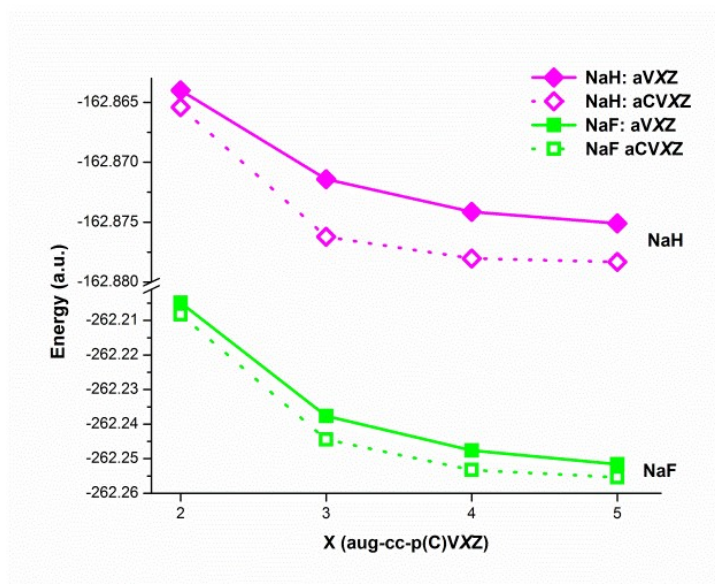

**Figure S9.** Convergence of the B3LYP/aug-cc-pVXZ and B3LYP/aug-cc-pCVXZ energies of NaH and NaF.

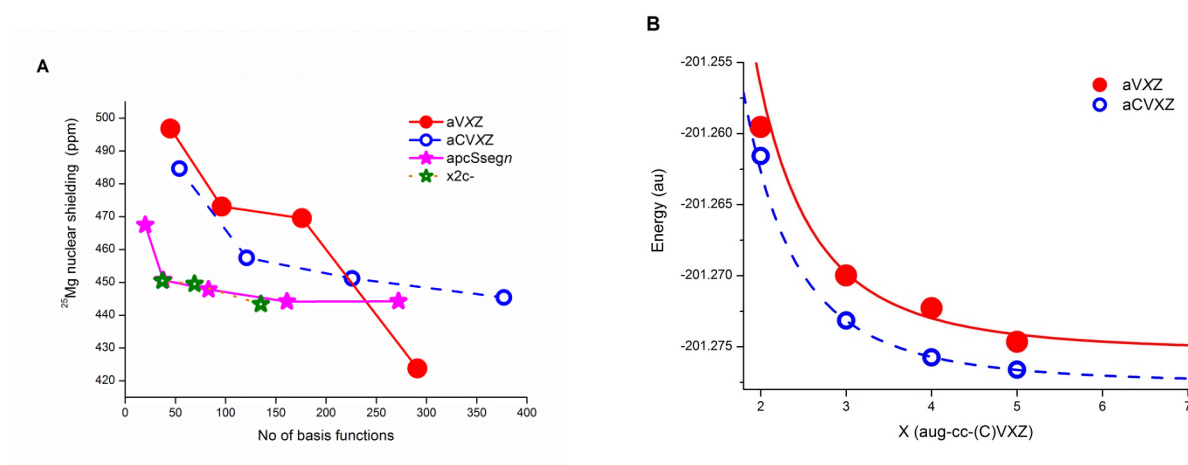

**Figure S10.** Convergence of  $^{25}\text{Mg}$  isotropic shielding constants for  $\text{MgH}_2$  calculated with the CCSD(T) method using the aug-cc-pVXZ, aug-cc-pCVXZ, aug-pcSseg- $n$  and x2c-XZVPall-s basis set families (A). Convergences of the B3LYP energies of  $\text{MgH}_2$  calculated with the aug-cc-pVXZ and aug-cc-pCVXZ basis sets are on the right (B)



# Supplemental Material

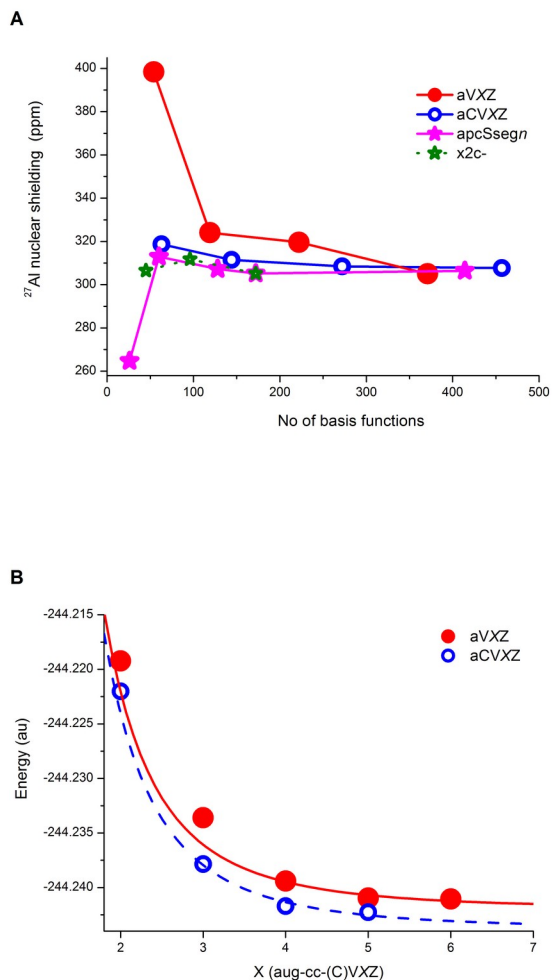

**Figure S11.**  $^{27}\text{Al}$  isotropic shielding constants for  $\text{AlH}_3$  predicted with the CCSD(T) method and the aug-cc-pVXZ, aug-cc-pCVXZ, aug-pcSseg- $n$ , and x2c-XZVPall-s basis set families (A). The B3LYP/aug-cc-pVXZ and B3LYP/aug-cc-pCVXZ calculated energies of  $\text{AlH}_3$  are on the right (B).

# Supplemental Material

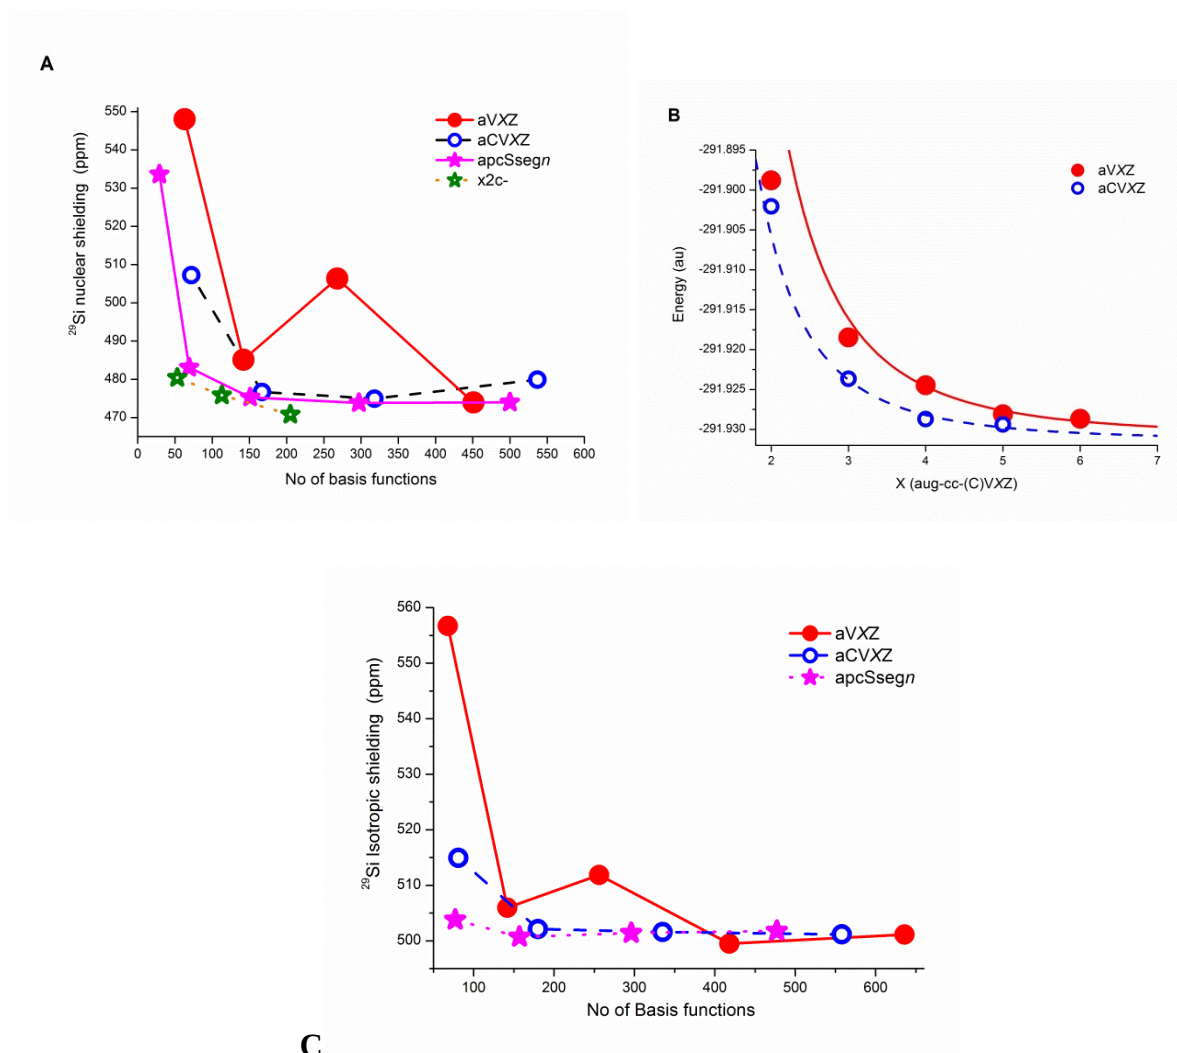

**Figure S12.**  $^{29}\text{Si}$  isotropic shielding constants for  $\text{SiH}_4$  calculated with the HF-SCF method and the aug-cc-pVXZ, aug-cc-pCVXZ, aug-pcSseg-*n*, and x2c-XZVPall-s basis set families (A). Convergences of the B3LYP/aug-cc-pVXZ and B3LYP/aug-cc-pCVXZ energies of  $\text{SiH}_4$  are on the right (B) and  $^{29}\text{Si}$  isotropic shielding constants for  $\text{HSiCH}$ , calculated with the B3LYP density functional combined with the aug-cc-pVXZ and aug-pcSseg-*n*, basis set families (C).

# Supplemental Material

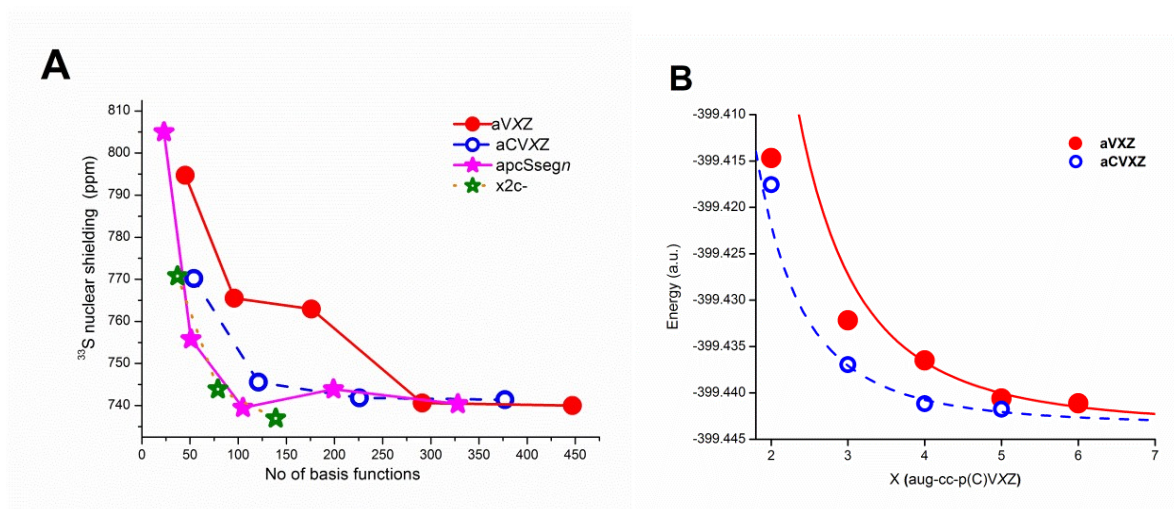

**Figure S13.** <sup>33</sup>S isotropic shielding constants for H<sub>2</sub>S calculated with the CCSD(T) method and the aug-cc-pVXZ, aug-cc-pCVXZ, aug-pcSseg-*n*, and x2c-XZVPall-s basis set families (A). Convergences of the B3LYP/aug-cc-pVXZ and B3LYP/aug-cc-pCVXZ energies of H<sub>2</sub>S are on the right (B).

# Supplemental Material

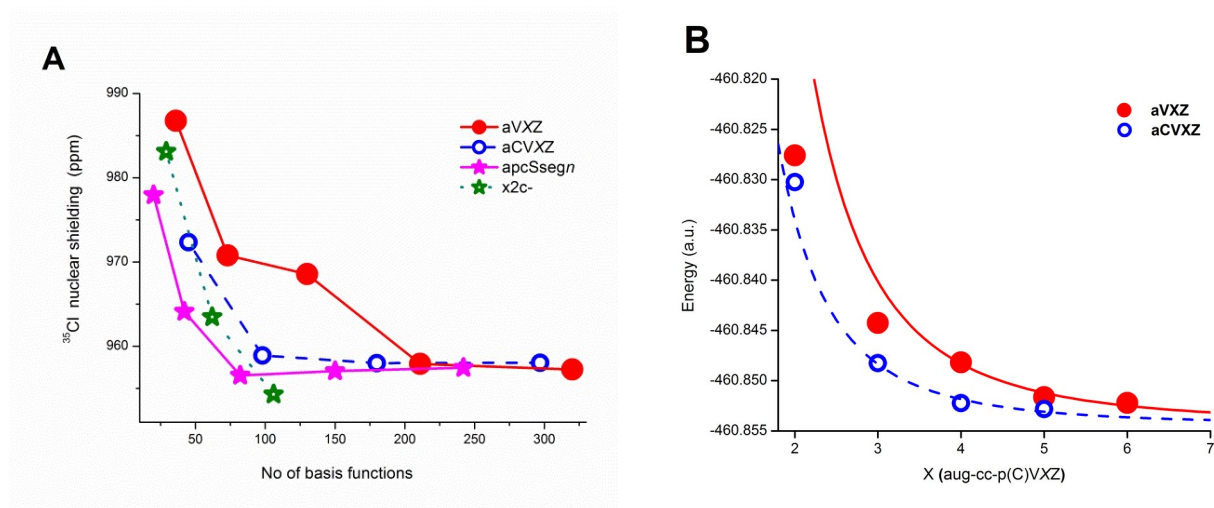

**Figure S14.**  $^{35}\text{Cl}$  isotropic shielding constants for HCl calculated with the CCSD(T) method and the aug-cc-pVXZ, aug-cc-pCVXZ, aug-pcSseg-n, and x2c-XZVPall-s basis set families (A). Convergences of the B3LYP/aug-cc-pVXZ and B3LYP/aug-cc-pCVXZ energies of HCl are on the right (B).

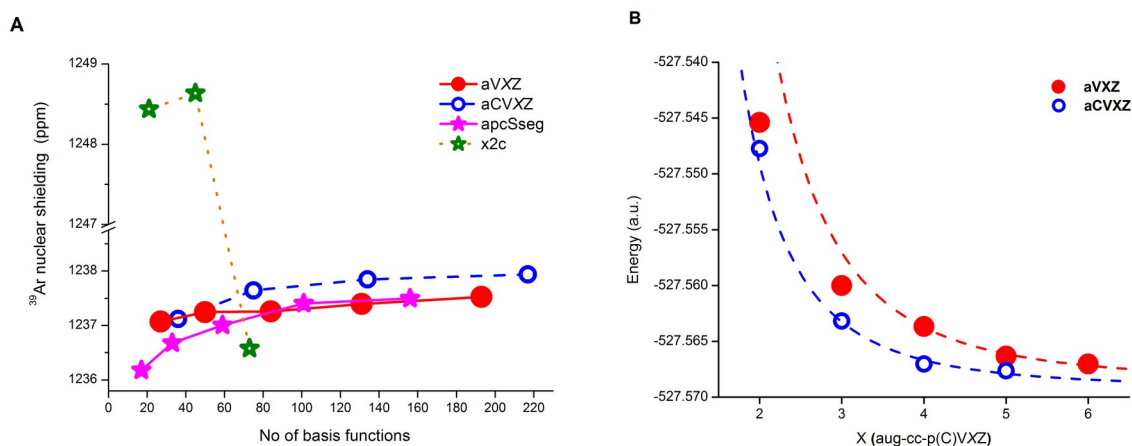

**Figure S15.**  $^{39}\text{Ar}$  isotropic shielding constants for isolated argon atom calculated with the CCSD(T) method using the aug-cc-pVXZ, aug-cc-pCVXZ, aug-pcSseg-n, and x2c-Def2 basis set families (A). Convergences of the B3LYP/aug-cc-pVXZ and B3LYP/aug-cc-pCVXZ energies of Ar are on the right (B).
